## Nucleus accumbens D1-receptors regulate and focus transitions to reward-seeking action

2  
4 Grima LL <sup>1,5</sup>, Panayi MC <sup>1,6</sup>, Haermson O <sup>1,2</sup>, Syed E <sup>1</sup>, Manohar SG <sup>1,3</sup>, Husain M <sup>1,3,4</sup>, & Walton ME <sup>1,4</sup>

6 <sup>1</sup> Department of Experimental Psychology, University of Oxford, Oxford, U.K.

8 <sup>2</sup> Medical Research Council Brain Network Dynamics Unit, University of Oxford, Oxford, U.K.

<sup>3</sup> Nuffield Department of Clinical Neurosciences, University of Oxford, Oxford, U.K.

10 <sup>4</sup> Wellcome Centre for Integrative Neuroimaging, University of Oxford, Oxford, U.K.

12 <sup>5</sup> Current address: Janelia Research Campus, Howard Hughes Medical Institute, Ashburn, VA, U.S.A.

14 <sup>6</sup> Current address: National Institute on Drug Abuse, Biomedical Research Center, 251 Bayview Boulevard, Suite 200, Baltimore, MD 21224, U.S.A.

16 Correspondence:

Laura Grima: [grimal@janelia.hhmi.org](mailto:grimal@janelia.hhmi.org)

18 Mark Walton: [mark.walton@psy.ox.ac.uk](mailto:mark.walton@psy.ox.ac.uk)

20 **Abstract**

22 While it is well established that dopamine transmission is integral in mediating the influence of reward  
24 expectations on reward-seeking actions, the precise causal role of dopamine transmission in moment-to-  
26 moment cue-driven behavioural control remains contentious. This is a particular issue in situations where  
28 it is necessary to refrain from responding to achieve a beneficial outcome. To examine this, we manipulated  
30 dopamine transmission pharmacologically as rats performed a Go/No-Go task that required them to either  
32 make or withhold action to gain either a small or large reward. Stimulation of D1Rs, both globally and  
34 locally in the nucleus accumbens core (NAcC) region consistently disrupted No-Go performance,  
36 potentiating inappropriate responses that clustered strongly just after cue presentation. D1R blockade did  
not, however, improve rats' ability to withhold responses, but instead primarily disrupted performance on  
Go trials. While global D1R blockade caused a general reduction of invigoration of reward seeking actions,  
intra-NAcC administration of the D1R antagonist by contrast increased the likelihood that Go trial  
performance was in an "unfocused" state. Such a state was characterised, both on and off drug, by a  
reduction in the precision and speed of responding even though the appropriate action sequence was often  
executed. These findings suggests that the balance of activity at NAcC D1Rs plays a key role in enabling the  
rapid activation of a focused, reward-seeking state to enable animals to efficiently and accurately achieve  
their goal.

## 38 Introduction

The balance of dopamine transmission plays a key role in mediating the efficacy of reward-guided  
40 behaviour (Dalley & Roiser, 2012; Floresco, 2015; Nicola, 2010; Robbins & Everitt, 2007). Reduction of  
dopamine transmission in ventral striatal regions such as the nucleus accumbens core (NAc) reduces the  
42 likelihood of responding to reward-associated cues and disrupts the willingness to persist with instrumental  
responses (du Hoffmann & Nicola, 2014; Salamone, Correa, Farrar, & Mingote, 2007; Yun, Nicola, & Fields,  
44 2004). Conversely, hyperdopaminergic states can also result in dysfunctional reward pursuit (Murphy,  
Robinson, Theobald, Dalley, & Robbins, 2008; Pattij, Janssen, Vanderschuren, Schoffeleer, & Van Gaalen,  
46 2007; Pezze, Dalley, & Robbins, 2007; Van Gaalen, Brueggeman, Bronius, Schoffeleer, & Vanderschuren,  
2006).

48 However, the precise relationship between reward expectation, dopamine transmission and behavioural  
control remains unclear. It is well established that the presentation of reward-associated cues rapidly  
50 causes changes in dopamine activity, the magnitude of which reflects the subjective value of the expected  
future reward (Collins, Aitken, Greenfield, Ostlund, & Wassum, 2016; Gan, Walton, & Phillips, 2010; Lak,  
52 Stauffer, & Schultz, 2014; Papageorgiou, Baudonnat, Cucca, & Walton, 2016). This acts to influence the  
activity of striatal medium spiny neurons (MSNs), particularly those expressing D1-like receptors (D1Rs)  
54 (Dreher & Jackson, 1989; Lahiri & Bevan, 2020; Nicola, Taha, Kim, & Fields, 2005; Oldenburg & Sabatini,  
2015; Richfield, Penney, & Young, 1989; Tritsch & Sabatini, 2012).

56 Different theories of dopamine posit that, on the one hand, it facilitates action *per se* through increasing  
vigour (Dayan, 2012; Niv, Daw, Joel, & Dayan, 2007) or on the other hand, that it facilitates reward-directed  
58 behaviour, making actions more precise (Bogacz, 2020; Friston et al., 2012). According to the first view,  
dopamine is a Pavlovian signal driving movement when reward expectation is high (Beierholm et al., 2013).  
60 In the second view, dopamine, by signalling the future reward on offer, might influence the efficiency and  
precision of any reward-guided behaviours based on the potential benefit accrued from rapidly and

62 successfully obtaining that reward (Hamid et al., 2016; Manohar et al., 2015). In addition, there is evidence  
that cue-driven changes in dopamine levels are themselves shaped by action initiation (Coddington &  
64 Dudman, 2018; Hughes et al., 2020; Phillips, Stuber, Helen, Wightman, & Carelli, 2003; Roitman, Stuber,  
Phillips, Wightman, & Carelli, 2004; Syed et al., 2016). Therefore, it is also possible that the balance of  
66 dopamine transmission might instead be critical to regulate when to transition to reward-seeking,  
particularly when actions are not simply directed at reward ("distal" actions) or stereotyped (Nicola, 2010;  
68 Robbins & Everitt, 2007; Walton & Bouret, 2019). When we are not engaged in reward-seeking behaviour,  
behavioural control is reduced, making actions more variable and therefore less precise (Costa, Mitz, &  
70 Averbeck, 2019; Humphries, Khamassi, & Gurney, 2012). We term this controlled engagement for reward,  
behavioural "focus". Behavioural focus in the form of cognitive control may also be governed by dopamine  
72 (Fallon et al., 2015; Westbrook & Frank, 2018).

One method to adjudicate between these accounts is to examine whether manipulating dopamine  
74 transmission differentially affects behavioural control in a context where cues on some occasions signal a  
requirement to make a response to gain reward and on other occasions to withhold responding to gain  
76 reward. We therefore trained rats on a symmetrically rewarded Go/No-Go task and investigated the  
effects of pharmacological stimulation and blockade of D1Rs, first systemically and then locally in the NAcC.  
78 By including an equal number of Go and No-Go trials associated with either high or low reward sizes, we  
could compare situations where a trial was either better or worse than the average reward expectation.  
80 Across all experiments we found that Go, but not No-Go trial accuracy, was improved when the large  
reward was on offer. Stimulation of D1Rs consistently and rapidly biased animals to initiate actions  
82 following cue presentation, both on Go trials when responding was appropriate and crucially also on No-  
Go trials when responding should have been withheld. Similarly, D1R blockade disrupted response  
84 execution on Go trials (but with no influence on No-Go performance). However, while this manifested as  
a general reduction in the vigour of the initial actions in a sequence when the D1R antagonist was

86 administered systemically, this was not consistently observed when it was infused directly into the NAcC.  
Instead, intra-NAcC D1R blockade selectively increased the *likelihood of failure* to respond appropriately on  
88 Go trials even though vigour when correctly completing a Go trial was unchanged. The response patterns  
on failed Go trials closely mirrored response failures off drug. Together this suggests that NAcC D1Rs  
90 normally play a key role in enabling reward expectations to regulate and focus reward seeking actions.

## 92 **Results**

To allow us to investigate how dopamine transmission mediates the influence of reward over behavioural  
94 control, rats were trained on an operant Go/No-Go task which required them either to make (Go) or  
withhold (No-Go) action in order to gain either a small or large reward (Syed et al., 2016; Fig. 1, 2a,b). Trials  
96 were initiated by the animal entering the nosepoke, which after a short delay resulted in one of 4 auditory  
cues to be presented. The identity of the cue instructed them either to leave the nosepoke and respond  
98 on the left or right lever, each of which was associated with either small or large reward (side fixed for each  
animals, counterbalanced across animals) (*Go Small* or *Go Large*) or to remain in the nosepoke for the  
100 holding period in order to gain either a small or large reward (*No-Go Small* or *No-Go Large*). Correct  
performance (selecting the cued lever and pressing it twice on *Go* trials or remaining in the nosepoke for  
102 the holding period on *No-Go* trials) resulted, after a 1s delay, in delivery of reward to a magazine on the  
opposite wall of the operant chamber.

104

106

108

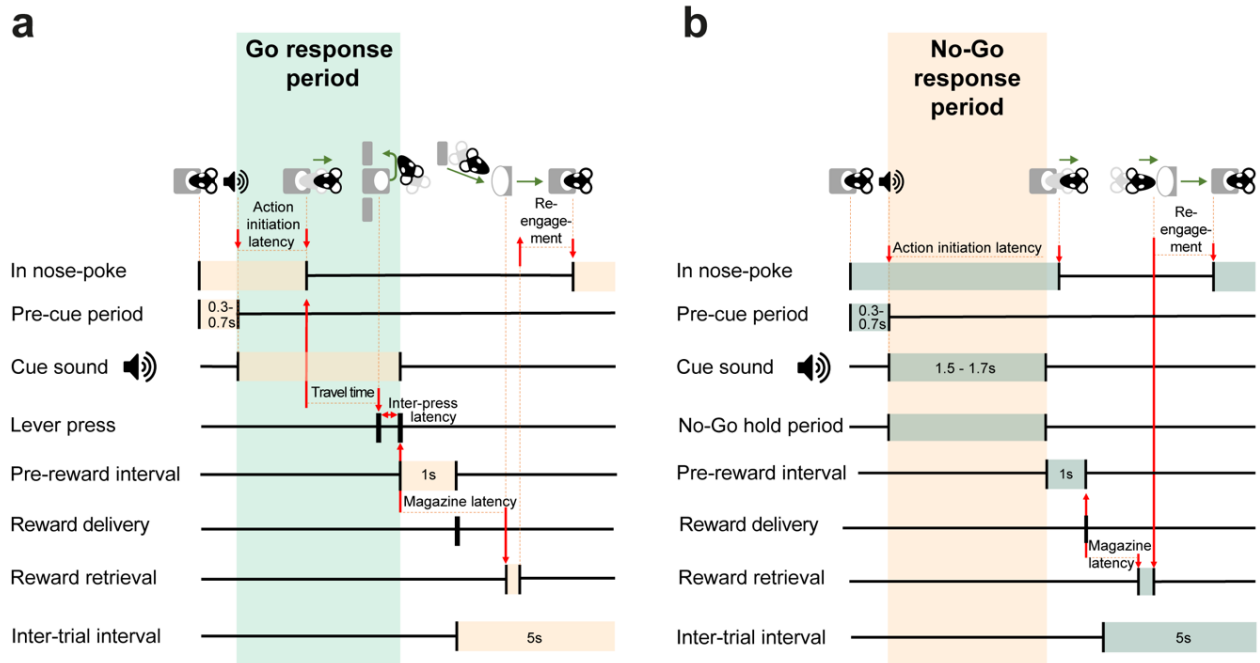

110 **Figure 1. Schematic illustrating the sequence of events and associated metrics in correctly executed Go and No-Go**  
 112 **trials. (a)** Sequence of events and measured latencies in Go trials. Orange shading indicates recorded latencies. Green  
 114 shading indicates Go trial response period, from leaving the nosepoke to completing two lever presses successfully.  
 (b) Same as in (a) but for No-Go trials. Here, green shading indicates latencies and orange shading indicates the  
 response period, in which mice were required to stay in the nosepoke.

116

118 Reward size and action requirements shape baseline performance on the task

As the current study focused more closely on behavioural measures, several of which are distinct to those  
 120 reported in Syed et al. (2016), we first sought to characterise the typical performance of animals on the  
 Go/No-Go task (Fig. 2a, b) and to determine how reliable this was across the two cohorts of rats used in  
 122 the study. Pooling data across all vehicle sessions from the systemic and local experiments where all doses  
 of the drug were administered showed that animals were able to perform well in the task (Fig. 2c), on  
 124 average achieving >75% success rate across all trial types. Reward size selectively influenced response  
 accuracy on Go but not No-Go trials (action x reward interaction:  $F_{(1,56)} = 19.455, p < .001$ ). The main error

126 type on Go trials was response omissions rather than wrong lever presses (main effect of error type:  $F_{(1,56)}$   
= 35.183,  $p < .001$ ), though the occurrence of both error types was decreased when the large reward was  
128 on offer (Fig. 2d; main effect of reward:  $F_{(1,56)} = 25.374$ ,  $p < .001$ ; error type x reward interaction:  $F_{(1,56)} =$   
7.834,  $p = .007$ ).

130 When animals made premature responses on No-Go trials, these seldom occurred proximal to cue onset  
in the first, 'early' half of the holding period and were instead more likely in the second, 'late' half (Fig. 2e;  
132 main effect of No-Go period:  $F_{(1,56)} = 43.806$ ,  $p < .001$ ). Further, although reward size did not change the  
overall number of No-Go errors, it did influence when these were likely to occur, with the prospect of large  
134 reward significantly decreasing impulsive responses in the early part of the holding period but not in the  
late part (period x reward interaction:  $F_{(1,56)} = 6.040$ ,  $p = .017$ ). Reward size also had a prominent influence  
136 on response latencies on Go and No-Go trials (Fig. 2f). Behaviour was faster when a large reward was on  
offer, both in terms of action initiation (main effect of reward:  $F_{(1,56)} = 38.710$ ,  $p < .001$ ) and travel time (on  
138 Go trials: main effect of reward:  $F_{(1,56)} = 24.349$ ,  $p < .001$ ), as well as reward retrieval (main effect of reward:  
 $F_{(1,55)} = 21.171$ ,  $p < .001$ ; one animal excluded due to faulty magazine detector).

140

142

144

146

148

150

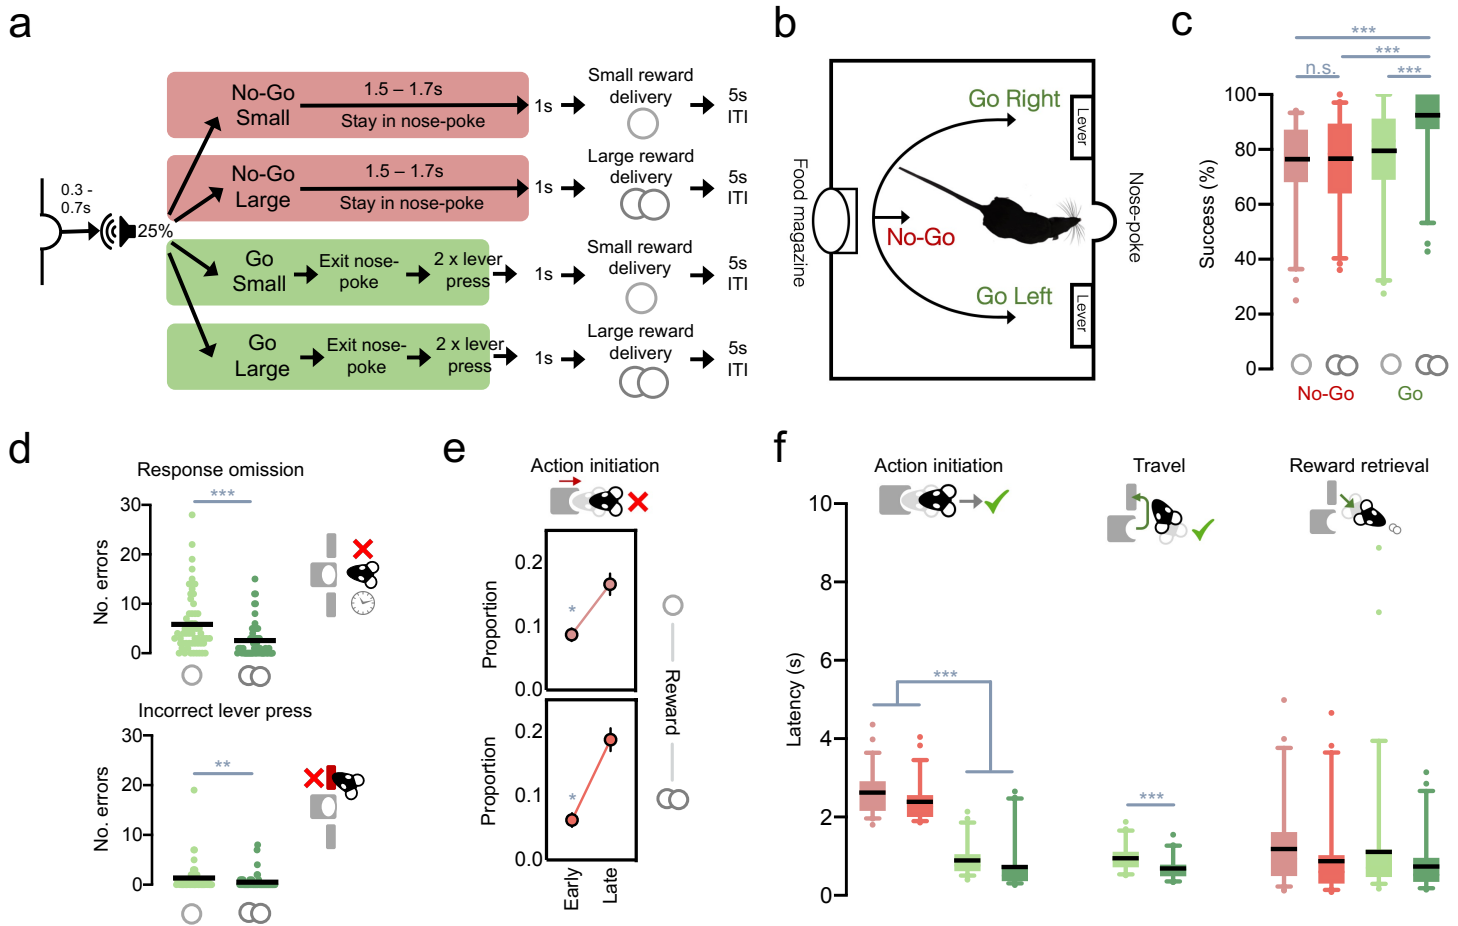

152 **Figure 2. Go/No-Go task and baseline performance.** (a) Schematic of the task trial types. Coloured shading indicates  
 when auditory cues remained on. (b) Schematic of the operant chamber layout. (c) Animals' performance in vehicle  
 154 sessions by session split by trial type (red: No-Go; green: Go; lighter shades denote small reward trials and darker  
 shades denote large reward trials). Solid lines indicate the mean, box extends from 25<sup>th</sup> to 75<sup>th</sup> percentiles, whiskers  
 156 indicate 5<sup>th</sup> and 95<sup>th</sup> percentiles. Pairwise comparisons: Go Large vs. Go Small/No-Go Small/No-Go Large: all  $p <$   
 .001; all other comparisons n.s.,  $p > .4$ . (d) Top: Total response omission errors per session. Pairwise comparison: Go  
 158 Small vs. Go Large:  $p < .001$ . Bottom: Total incorrect lever press errors per session. Pairwise comparison: Go Small  
 vs. Go Large:  $p = .006$ . (e) Mean proportion of times spent in the nosepoke across error No-Go trials in which  
 160 animals exited early (<800ms) or late (>800ms) when a small (upper) or large (lower) reward was on offer. Pairwise  
 comparisons: Early Small vs. Early Large:  $p = .008$ ; Late Small vs. Late Large: n.s.,  $p = .134$ . (f) Mean latencies to  
 162 complete key task events in correct trials split by trial type. \*\*\*  $p < .001$ , \*\*  $p < .01$ , \*  $p < .05$

164

166 Importantly, although the animals in the cannulated cohort had on average slightly lower success rates on  
 all trial types (main effect of cohort:  $F_{(1,56)} = 6.102$ ,  $p = .017$ ), on almost all other task latency measures there  
 168 was no reliable difference across cohorts (all main effects or interactions with cohort:  $F < 2.6$ ,  $p > .1$ ; except



for cohort x reward for the time in nosepoke metric  $F_{(1,56)} = 4.699$ ,  $p = .034$ , though even here post-hoc  
170 tests showed no difference between cohorts, both  $p > .2$ ). Taken together, this demonstrates that baseline  
behaviour on the Go/No-Go task across both cohorts is strongly and consistently mediated by both action  
172 requirements and reward size.

#### 174 Global D1Rs regulate action initiation and the vigour of actions distal to reward

We next investigated what role D1Rs play in modulating appropriate action restraint and action initiation  
176 for future reward by analysing the effects of systemic administration of either a D1 agonist, SKF-81297  
(Cohort 1) or a D1 antagonist, SCH-23390 (Cohort 2, *see methods*).

#### 178 *No-Go trials*

180 Systemic administration of a D1R agonist SKF-81297 had no influence on rates of aborted trials during the  
pre-cue hold period (main effect of drug:  $F < .5$ ,  $p > .6$ , data not shown). However, it substantially impaired  
182 performance in No-Go trials (Fig. 3a; main effect of drug:  $F_{(2,20)} = 14.911$ ,  $p < .001$ ; drug x reward interaction:  
 $F_{(2, 20)} = 3.467$ ,  $p = .051$ ), elevating the overall number of errors (main effect of drug:  $F_{(2,20)} = 12.165$ ,  $p <$   
184  $.001$ ). As can be observed in Fig. 3c, the drug did not cause a uniform increase in the probability of making  
a premature response; instead, D1R stimulation selectively increased inappropriate action initiation only in  
186 the early half of the No-Go hold period (Fig. 3d; drug x error period interaction:  $F_{(2,20)} = 7.780$ ,  $p = .003$ . This  
was effectively the opposite of the effect of reward, which reduced early leaving; no drug x reward x period  
188 interaction,  $p > .3$ ). On correct No-Go trials, when animals had successfully withheld responding during the  
No-Go period, D1R stimulation did not change the overall speed of initiation but did reduce the difference  
190 between latencies in small and large reward trials (Fig. 3b; drug x reward interaction:  $F_{(2,20)} = 7.264$ ,  $p = .004$ ;

main effect of drug n.s.,  $F < .5$ ,  $p > .6$ ) although there was no corresponding effect on reward collection ( $F$   
 192  $< 1.9$ ,  $p > .1$ , data not shown).

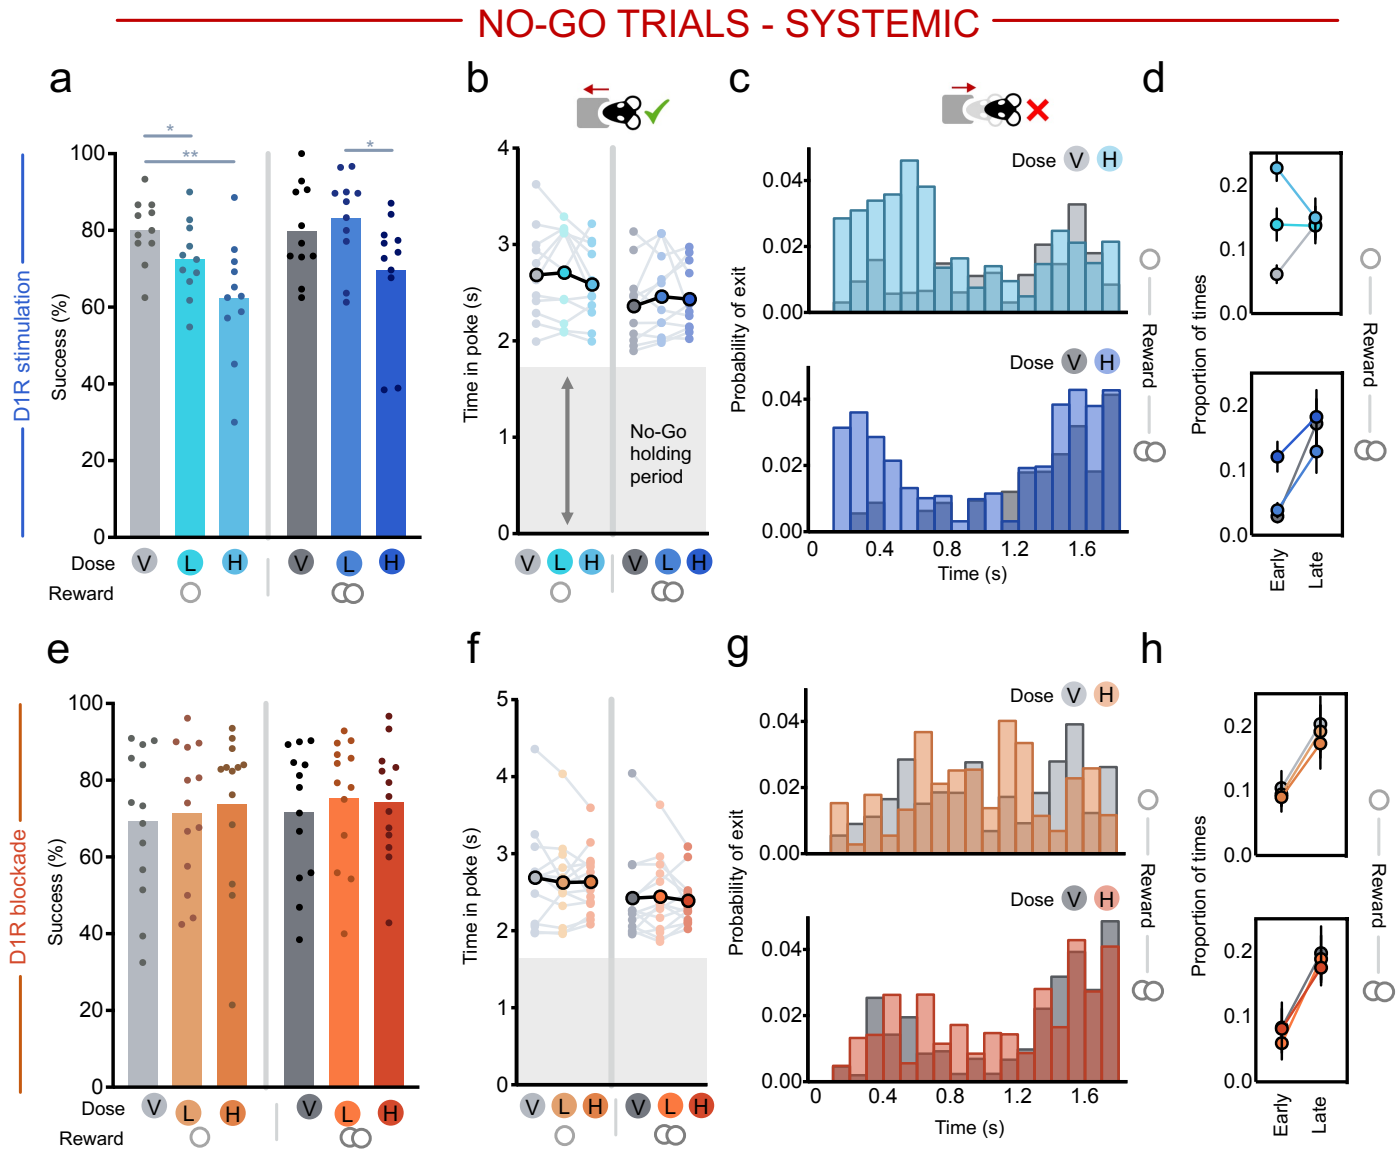

194 **Fig. 3. Systemic effects of D1R stimulation (SKF-81297) or blockade (SCH-23390) in No-Go trials.** V = vehicle, L = low  
 196 dose, H = high dose. Single circle indicates small reward condition, double circle indicates large reward condition. (a-  
 198 b) Effects of D1R stimulation split by small (left) and large (right) reward No-Go trials on (a) success rate and (b) time  
 200 in nosepoke in successful trials. For b, analysis of pairwise comparisons due to significant drug x reward interaction:  
 202 vehicle small reward vs. large reward:  $p = .005$ , low dose small reward vs. large reward:  $p = .012$ , high dose small  
 reward vs. large reward:  $p = .071$ . (c) Mean probability histogram of time in nosepoke in failed small (upper) and large  
 (lower) reward No-Go trials for saline (grey) or high dose (blue) manipulations, calculated as probability over all head  
 exit times. (d) Mean proportion of times spent in the nosepoke across trials in which animals exited early (<800ms) or  
 late (>800ms) when a small (upper) or large (lower) reward was on offer. Pairwise comparisons: early period vehicle

204 vs. low dose:  $p = .003$ , vehicle vs. high dose:  $p < .001$ ; late period, all  $p > .5$ . **(e-h)** Same as in **(a-d)** but for systemic D1R blockade. **\*\*** $p < .01$ , **\*** $p < .05$

206

208

Taken together, these results demonstrate a role of activity at global D1Rs in promoting early cue-driven  
210 action both when a small or a large reward was on offer. However, this effect was asymmetric as systemic  
D1R blockade with the antagonist SCH-23390 had no significant effect on No-Go performance (Fig. 3e; no  
212 main effect of drug, reward, or interaction: all  $F < .6$ ,  $p > .4$ ), latencies to leave the nosepoke (Fig. 3f-h; all  $F < .7$ ,  $p > .5$ ) or time taken to collect reward in successful trials (all  $F < 1.0$ ,  $p > .4$ ).

214

#### *Go trials*

216 We next sought to examine the influence of D1Rs on the accuracy and speed of action on Go trials.  
Unexpectedly, both systemic D1R stimulation *and* D1R blockade impaired performance on Go trials.

218 The D1R agonist reduced success rate selectively on Go Small trials at the highest dose (Fig. 4a; drug x  
reward:  $F_{(2,20)} = 4.135$ ,  $p = .031$ ). This was caused both not only by a numeric increase in response omissions  
220 on Go Small trials (Fig. 4b; drug x reward:  $F_{(2,20)} = 3.346$ ,  $p = .056$ ), but also by a small but reliable increase  
in the number of wrong lever errors on Go Small trials (i.e., high reward lever) (Fig. 4c; drug x reward:  $F_{(2,20)}$   
222  $= 4.515$ ,  $p = .024$ ). Although the D1R agonist numerically speeded animals' latency to exit the start poke  
on small reward trials (Fig. 4d;  $F_{(2,20)} = 2.775$ ,  $p = .086$ ), it *slowed* travel time from head exit to a correct  
224 lever response (Fig. 4e; main effect of drug:  $F_{(2,20)} = 6.331$ ,  $p = .007$ ), in line with greater response  
competition from the high reward lever. Subsequent trial re-initiation latencies after success were also  
226 slower (main effect of drug:  $F_{(2,20)} = 11.954$ ,  $p < .001$ ).

The D1R antagonist also caused a dose-dependent reduction in Go trial success rate (Fig. 4g; main effect of  
228 drug:  $F_{(2,24)} = 7.015$ ,  $p = .004$ ; drug x reward interaction n.s,  $F < 1.1$ ,  $p > .3$ ). However, this was driven primarily

by increased response omissions (Fig. 4h; main effect of drug:  $F_{(2,24)} = 6.846$ ,  $p = .004$ ; drug x reward  
230 interaction,  $F < 2.9$ ,  $p > .07$ ) and there was no effect on the ability to select the correct lever (Fig. 4i; no  
main effect or interaction of drug:  $F < .9$ ,  $p > .4$ ). D1R blockade also slowed latencies, but this was evident  
232 for *all* distal elements – i.e. all actions aside from direct approach to the food magazine – of the Go trial  
sequence: exiting the start poke (Fig. 4j; main effect of drug:  $F_{(2,24)} = 8.607$ ,  $p = .002$ ; drug x reward  
234 interaction:  $F_{(2,24)} = 2.903$ ,  $p = .074$ ), travelling to the lever (Fig. 4k; main effect of drug:  $F_{(2,24)} = 13.226$ ,  $p <$   
 $.001$ ), and reinitiating the subsequent trial after success (main effect of drug:  $F_{(2,24)} = 12.231$ ,  $p < .001$ , data  
236 not shown). However, there is indication that this was not a non-specific motoric effect as the drug did not  
significantly slow time to retrieve reward following successful trial completion (Fig. 4l; no main effect or  
238 interaction with drug: both  $F < 2.1$ ,  $p > .15$ ).

240

242

244

246

248

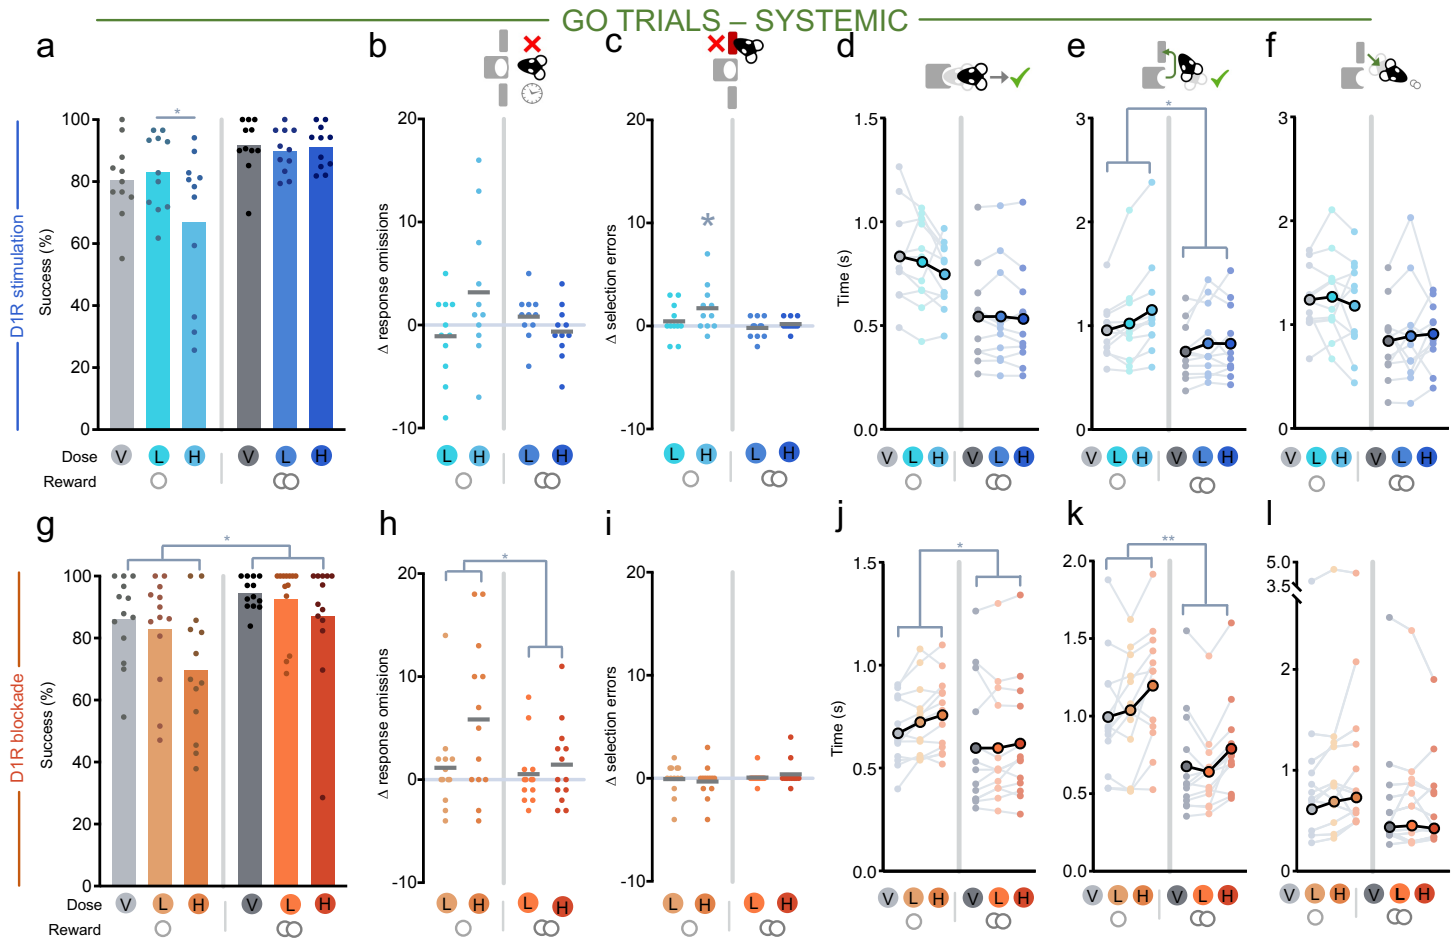

250 **Figure 4. Systemic effects of D1R stimulation (SKF-81297) or blockade (SCH-23390) in Go trials.** V = vehicle, L = low  
 252 dose, H = high dose. Single circle indicates small reward condition, double circle indicates large reward condition. (a-  
 254 f) Effects of local D1R stimulation split by small (left) and large (right) reward Go trials on (a) success rate, (b) response  
 256 omission errors (relative to vehicle session), (c) lever selection errors (relative to vehicle session), (d) latency to leave  
 the nosepoke after Go cue onset, (e) latency from nosepoke exit to first lever press, (f) and latency from trial  
 completion to entering the food magazine to retrieve reward. (g-l) Same as in (a-f) but for systemic D1R blockade.  
 \*\* $p < .01$ , \* $p < .05$

258

In sum, as with No-Go trials, we again find an asymmetric effect of stimulation and blockade of D1Rs. But

260 here, whilst the D1R agonist affected animals' ability to efficiently perform the correct action – as also

demonstrated by the increase in wrong lever responses and slower travel times – the D1R antagonist more

262 broadly slowed actions outside of directly travelling to retrieve reward such that animals increasingly

omitted responding. This influence of D1Rs on rapid cued action and the vigour of actions distal to reward  
264 appeared specific to this receptor, as systemic administration of a D2R agonist instead slowed all Go and  
No-Go latencies (Supp. Text 1, Supp. Fig. 1).

266

#### D1Rs in NAcC selectively shape action likelihood and focus

268 The first experiments demonstrated a key selective role for D1Rs in rapid modulation of action restraint  
and initiation. As our previous study had demonstrated a close relationship between fast increases in  
270 dopamine levels in NAcC and action initiation (Syed et al., 2016), our overall hypothesis was that D1Rs in  
NAcC would be a critical locus for this. In particular, we hypothesised that on No-Go trials, stimulating D1Rs  
272 in the NAcC would promote action over inaction, causing an increase in fast premature errors on No-Go  
trials and reducing latencies to initiate responding on Go trials. By contrast, antagonism of this receptor  
274 subtype would have little effect on No-Go trials (as endogenous dopamine is already suppressed on these  
trials), but would slow responding on Go trials. Furthermore, based on previous work showing that  
276 mesolimbic dopamine has a limited role in selecting *between* actions, particularly when the required  
response paths are fixed (Hollon, Arnold, Gan, Walton, & Phillips, 2014; Nicola, 2010), we reasoned there  
278 should be no change in the type of errors made or how animals executed actions in Go trials. Therefore,  
we examined the effects of infusions of either the D1R agonist or antagonist directly into the NAcC (cohort  
280 2). To ensure consistency with the effects we observed in the first cohort, prior to surgery we replicated  
the systemic D1R agonist experiment and found a comparable pattern of effects on No-Go and Go  
282 performance (Supp. Fig. 2; drug x cohort interactions: all  $p > .2$ ).

284

286 *No-Go trials*

On No-Go trials, intra-NacC administration of a D1R agonist or antagonist replicated the majority of the  
288 effects of systemic administration. Specifically, NAcC D1R stimulation increased premature responses after  
cue onset on No-Go trials (Fig. 5a; main effect of drug:  $F_{(2,24)} = 8.459, p = .002$ ) and this was again particularly  
290 evident early in the No-Go holding period, although here the highest dose also increased errors in the late  
period (Fig. 5c, d; main effect of drug:  $F_{(2,22)} = 6.630, p = .006$ ; drug x period interaction:  $F_{(2,22)} = 3.613, p =$   
292  $.044$ ). On correctly performed No-Go trials, as before, there were no reliable changes in the speed to exit  
the nosepoke (Fig. 5b) or to reach the magazine (all  $F < 2.7, p > .09$ ).

294 To investigate what was causing this increase in premature errors, we used video tracking on a subset for  
rats for which we were able to perform video analyses ( $n = 6$ , see *Methods*) to establish the behaviour of  
296 the rats in these erroneous No-Go trials (Supp Fig 3a, b). This revealed that rats were more likely to directly  
visit the food magazine than either lever, particularly when a large reward was on offer (Supp. Fig. 3c-e;  
298 main effect of  $F_{(2,8)} = 13.448, p = .003$ ; location x reward interaction:  $F_{(2,8)} = 4.899, p = .041$ ). Importantly,  
this response pattern was comparable after intra-NAcC D1R agonist administration (Supp. Fig. 3c-e; main  
300 effect of drug, drug x reward x location interaction, both  $F < 1.6, p > .25$ ), the only difference being that the  
drug tended to reduce the likelihood of reaching any target location on small reward trials (drug x reward  
302 interaction:  $F_{(1,4)} = 27.495, p = .006$ ). Therefore, although stimulation of NAcC D1Rs increased the *likelihood*  
of premature No-Go responses, this was not driven by a selective change in responses towards the levers  
304 or food magazine.

By contrast, intra-NAcC infusion of the D1R antagonist had no effect on performance or latencies in No-Go  
306 trials, replicating the pattern of results from systemic administration (Fig. 5e-h; all  $F < 1.6, p > .2$ ). This  
implies that NAcC D1R stimulation rapidly promotes action over inaction in the presence of reward-  
308 associated cues, even though here this is disadvantageous.

## NO-GO TRIALS - NAcC

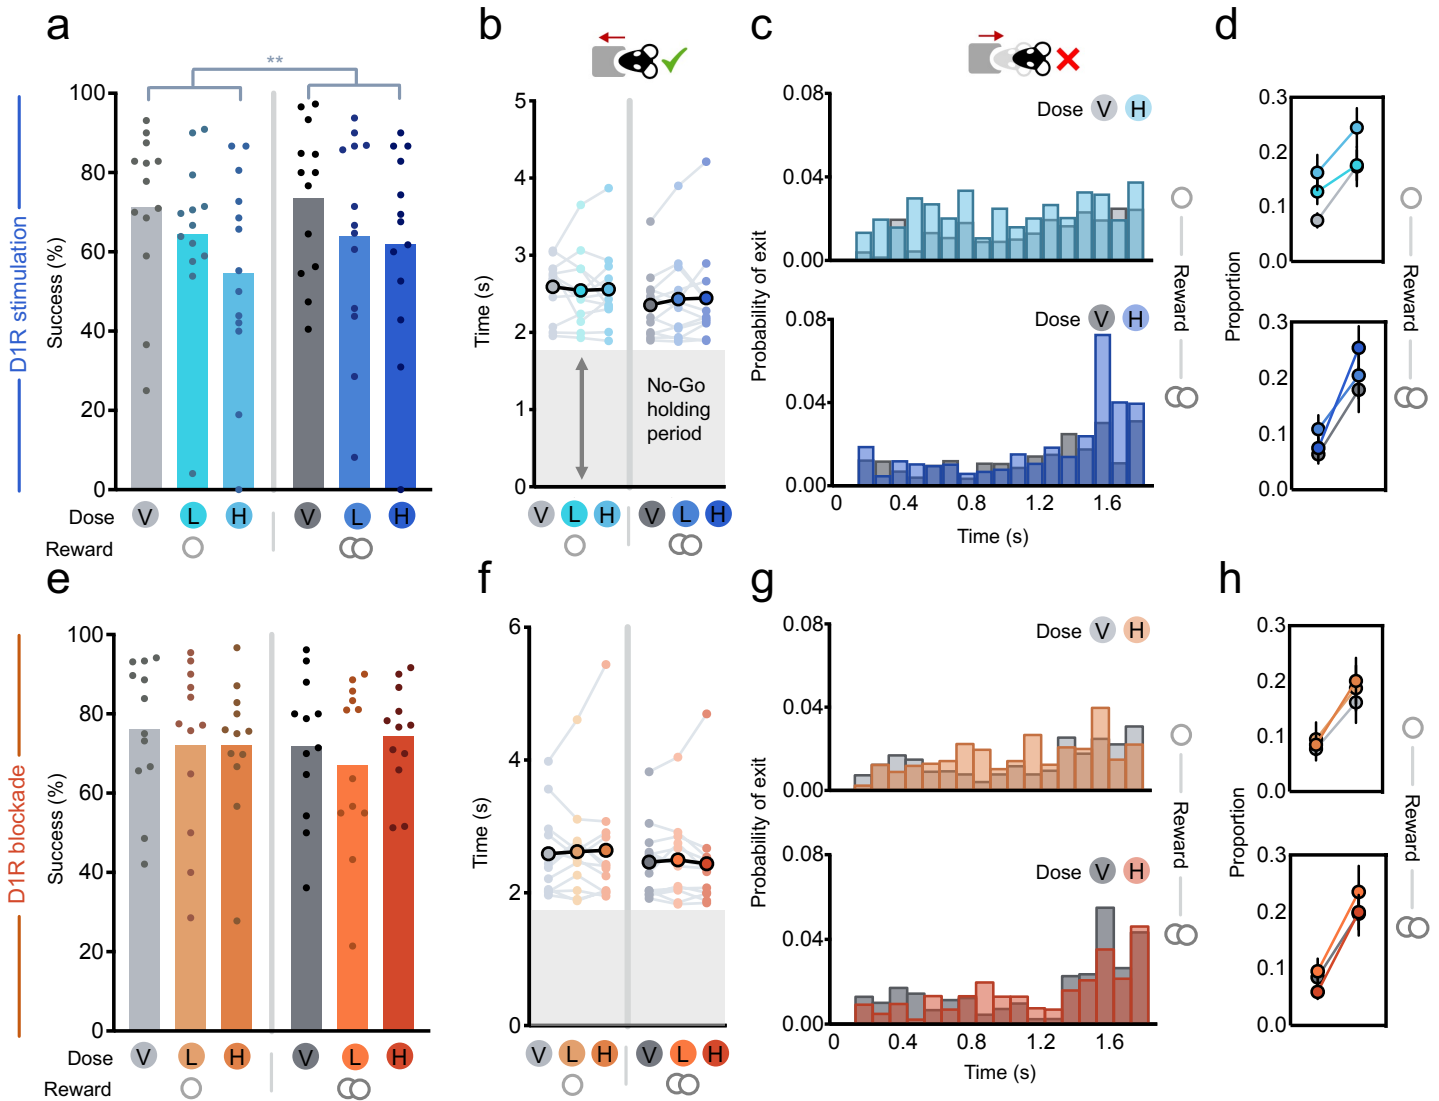

310 **Fig. 5. Effects of intra-NAcC D1R stimulation (SKF-81297) or blockade (SCH-23390) in No-Go trials.** V = vehicle, L = low  
 312 dose, H = high dose. Single circle indicates small reward condition, double circle indicates large reward condition. **(a-**  
 314 **b)** Effects of D1R stimulation split by small (left) and large (right) reward No-Go trials on **(a)** success rate and **(b)**  
 316 and time in nosepoke in successful trials. **(c)** Mean probability histogram of time in nosepoke in failed small (upper) and  
 318 large (lower) reward No-Go trials for saline (grey) or high dose (orange and red) manipulations, calculated as  
 probability over all head exit times. (Pairwise comparisons: early period vehicle vs. low dose:  $p = .019$ , vehicle vs. high  
 dose:  $p = .022$ ; late period vehicle vs. high dose:  $p = .009$ , vehicle vs. low dose: n.s.,  $p > .6$ ). For this analysis we excluded  
 1 animal where on average  $> 50\%$  of the errors occurred in the early No-Go period, which was  $> 3$  S.D. from the group.  
**(d)** Mean proportion of times spent in the nosepoke across trials that were early ( $< 800\text{ms}$ ) or late ( $> 800\text{ms}$ ) for small  
 (upper) and large (lower) reward trials. **(e-h)** Same as in **(a-d)** but for local D1R blockade. **\*\*** $p < .01$ , **\*** $p < .05$

320

322



### *Go trials*

324 The effect of intra-NAcC administration of the D1R agonist or antagonist had more selective effects on Go  
trials than was observed after systemic administration. Stimulation of NAcC D1Rs, unlike systemic  
326 administration, had no overall effect on the proportion of correct responses on Go trials (Fig. 6a; main  
effect of drug and interaction: both  $F < 2.3$ ,  $p > .1$ ). It did, however, promote faster action initiation (Fig.  
328 6d; main effect of drug:  $F_{(2, 24)} = 4.046$ ,  $p = .031$ ), although, unlike with systemic administration, neither the  
speed with which animals travelled to the lever or retrieved the reward were affected (Fig. 6e, f; both  $F <$   
330  $.9$ ,  $p > .4$ ). This further supports a role for NAcC D1R stimulation in the rapid promotion of action initiation  
as only the speed to initiate the action sequence was altered.

332 Blockade of NAcC D1Rs resulted in a lower success rate in Go trials, mirroring the effect with systemic  
administration (Fig. 6g; main effect of drug:  $F_{(2, 22)} = 4.559$ ,  $p = .022$ ), and this was again caused by a selective  
334 increase in response omissions (Fig. 6h; main effect of drug:  $F_{(2, 22)} = 4.542$ ,  $p = .022$ ; lever selection errors  
both  $F < 1.9$ ,  $p > .18$ ; Fig. 6i). However, whereas systemic D1R blockade had significantly slowed distal  
336 latencies, here, surprisingly, intra-NAcC administration of the D1R antagonist did not affect any latencies –  
action initiation, travel time, and reward collection (Fig. 6j-l; no main effects or interactions with drug, all  $p$   
338  $> .09$ ).

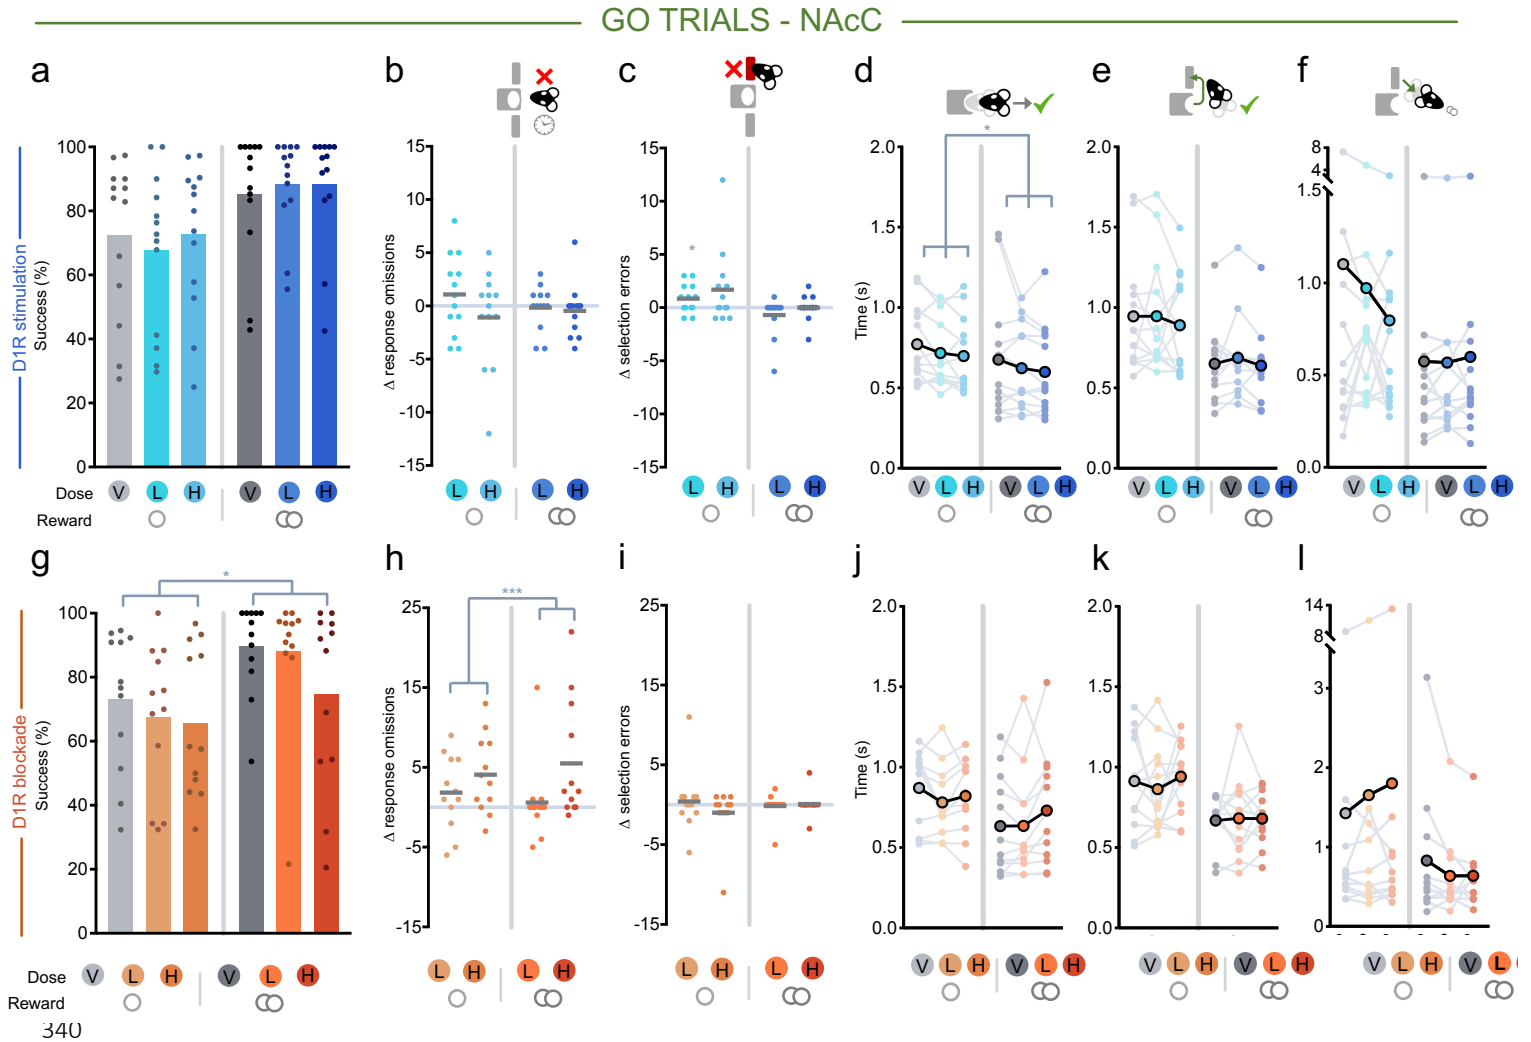

**Fig. 6. Effects of intra-NAcC D1R stimulation (SKF-81297) or blockade (SCH-23390) in Go trials.** V = vehicle, L = low dose, H = high dose. Single circle indicates small reward condition, double circle indicates large reward condition. **(a-f)** Effects of local D1R stimulation split by small (left) and large (right) reward Go trials on **(a)** success rate, **(b)** response omission errors, **(c)** lever selection errors, **(d)** latency to leave the nosepoke after Go cue onset, **(e)** latency from nosepoke exit to first lever press, **(f)** and latency from trial completion to entering the food magazine to retrieve reward. **(g-l)** Same as in **(a-f)** but for local D1R blockade. \*\* $p < .01$ , \* $p < .05$

348 *Focused responding on Go trials is shaped by reward and is mediated by NAcC D1Rs*

These data demonstrate a conspicuous and surprising dissociation of intra-NAcC D1R blockade between  
 350 the disruption of successful Go trial completion within a 5s time window (Fig. 6g-h) coupled with an absence

of effect on the speed of responding on correctly performed Go trials (Fig 6j-l). To understand this better,  
352 we examined in more detail the pattern and performance on Go trials on and off intra-NAcC D1R blockade.

First, we investigated whether this dissociation could be caused by the intra-NAcC D1R antagonist having a  
354 cumulative effect on arousal within a session. We reasoned that if this was the case, on drug, the correct  
responses with normal response latencies may predominate at the beginning of the session and the  
356 response omissions may cluster later in the session. In fact, however, these elevated error rates were  
equally distributed across the session in both vehicle and drug sessions and a difference in response trial  
358 omission rates was already apparent in the first quartile of the session (Fig. 7a; main effect of drug:  $F_{(2,22)} =$   
4.609,  $p = .021$ ; no main effect of quartile or interaction, both  $F < .7$ ,  $p > .5$ ).

Next, we examined whether the drug caused rats' responding on these omission trials to be more likely to  
be disordered. We reasoned that this could manifest in three ways: (1) "opting out", staying near the start  
362 port and waiting for the next trial; (2) "incorrect cue detection", revealed by an increase in trajectories to  
the wrong lever; or (3) "unfocused", where the appropriate action is taken, but with less vigour and  
364 accuracy, thereby resulting in the rat failing to meet the response requirement of the trial. To assess this,  
we again examined response variables and within-trial trajectories using video tracking on a subset of rats  
366 ( $n=7$ , see *Methods*; note that for analyses comparing within-subject changes in performance on and off  
drug for both reward sizes,  $n=5$  due to 2 animals not making response omission errors in the saline  
368 condition. Replicated analyses when averaged across rewards to give  $n = 7$  result in the same direction of  
effects in all cases), focusing on comparisons between intra-NAcC administration of the high dose of the  
370 D1R antagonist or vehicle.

While animals were overall slower to initiate actions on omission trials in comparison to correctly  
372 performed Go trials, importantly this was no different with or without intra-NAcC D1R blockade (Fig. 7b;  
main effect of outcome:  $F_{(1,4)} = 11.816$ ,  $p = .026$ ; no main effect of drug or interaction with outcome or

374 reward, all  $F < 1.5$ ,  $p > .2$ ; if only small reward trials analysed to account for the low error rates on high  
reward trials on vehicle, main effect of outcome:  $F_{(1,9)} = 13.328$ ,  $p = .005$ ; no main effect of drug or  
376 interaction with outcome, all  $F < .9$ ,  $p > .4$ ). Similarly, time spent in a defined area near the nosepoke after  
erroneous head exits in Go trials was unchanged by the intra-NAcC D1R antagonist, suggesting that rats  
378 were not “opting out” (Fig.7e; no main effect of drug or interaction, both  $F < 1.0$ ,  $p > .3$ ).

In fact, during the 5s cue presentation on these omission trials, rats not only moved away from the  
380 nosepoke, but they would often perform similar sequences of actions as on correct Go trials – moving  
towards the cued lever and even subsequently heading to the food magazine (Fig. 7c-f). This suggests that  
382 rats were not suffering from erroneous cue detection. Strikingly this pattern was equivalent whether or  
not they had been administered the D1R antagonist or vehicle, despite the fact that the overall propensity  
384 of rats to make omission errors was increased with the antagonist. Specifically, the proportion of omission  
trials in which rats first visited the region of the correct lever was significantly higher in comparison to first  
386 visiting the incorrect lever, but this was unaltered by the drug (main effect of outcome:  $F_{(1,4)} = 100.791$ ,  $p =$   
.001; no main effect of drug, reward, or interactions, all  $F < .5$ ,  $p > .4$ ; average proportion of correct lever  
388 responses: vehicle small reward:  $0.72 \pm 0.11$ , large reward:  $0.75 \pm 0.14$ ; SCH small reward:  $0.65 \pm 0.09$ ,  
large reward:  $0.65 \pm 0.15$ , mean $\pm$ SEM) and the cumulative probability of visiting the area near the correct  
390 lever when on drug did not significantly differ from vehicle (no main effect of drug or interaction, both  $F <$   
.4,  $p > .5$ ). There was also no difference due to drug in how likely the rats were to visit the correct lever  
392 and then go on complete the trajectory by visiting the magazine (no main effect or interaction with drug,  
both  $F < .5$ ,  $p > .5$ ; vehicle small reward:  $0.42 \pm 0.11$ , large reward:  $0.53 \pm 0.21$ ; SCH small reward:  $0.39 \pm 0.14$ ,  
394 large reward:  $0.42 \pm 0.15$ ). Overall, trajectory lengths during the 5s cue window were comparable between  
error and correct trials on or off drug (no main effect of drug or interaction, both  $F < 1.2$ ,  $p > .3$ ).

396 Yet importantly, although the trajectories on omission trials contained many features common with  
correctly performed Go trials, responding on omissions nonetheless lacked equivalent focus and precision.

398 This is in part demonstrated by the fact that in omission trials they were more likely to make a single  
 response on the correct lever rather than the two required for the trial to be successful (Fig. 7h; main effect  
 400 of drug:  $F_{(2,22)} = 5.571, p = .011$ ). Moreover, the entropy, or noisiness, of the animals' trajectories in  
 omission trials on and off drug showed a strong trend for entropy to be increased by the intra-NAcC D1R  
 402 antagonist (Fig. 7i; main effect of drug:  $F_{(1,4)} = 7.201, p = .055$ ).

Together this suggests that the promise of reward, signalled by cues, facilitates animals to engage in  
 404 focused reward-seeking sequences through NAcC D1Rs and that blockade of these signals reduces the  
 likelihood of animals transitioning to this focused reward-seeking state.

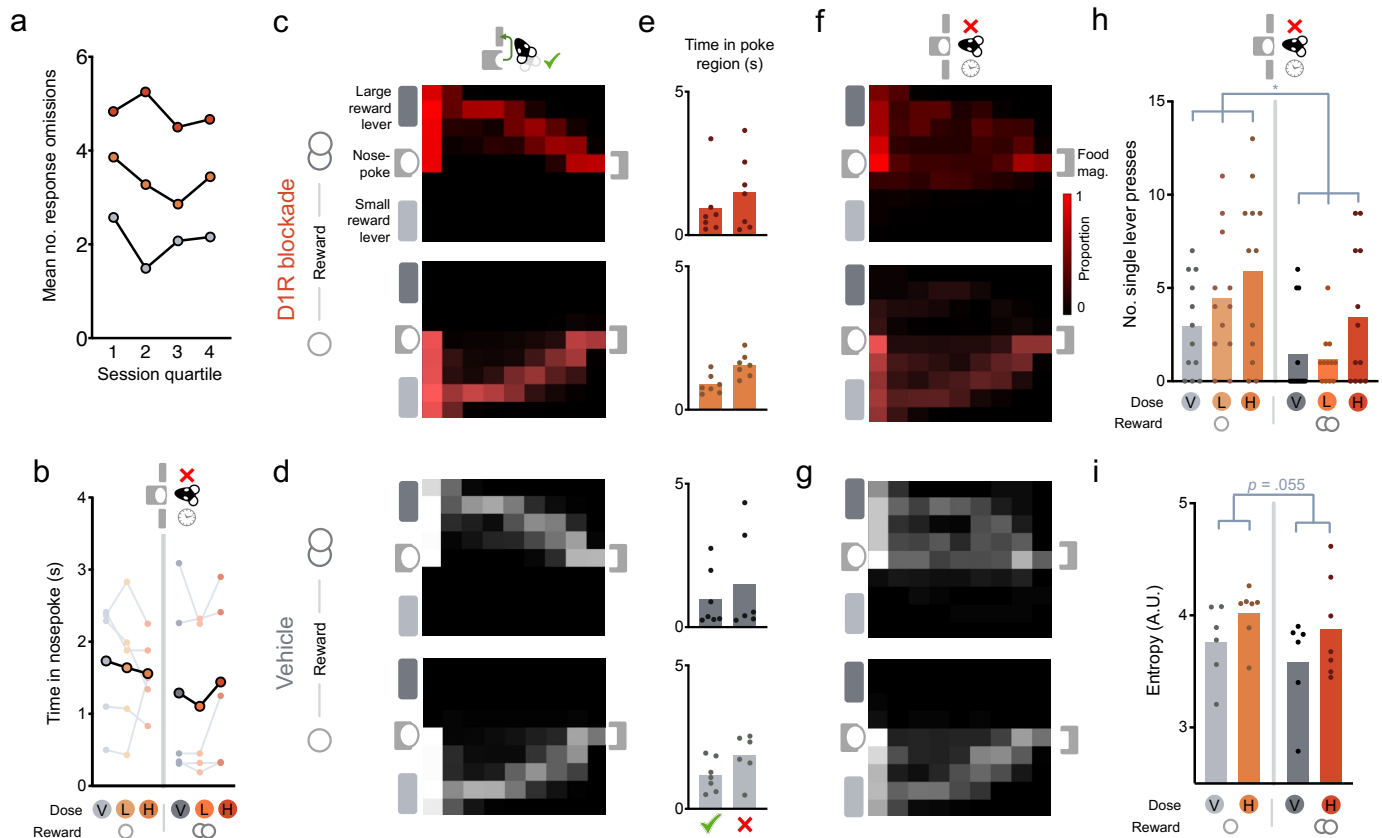

406 **Fig. 7. The effects of intra-NAcC D1R blockade (SCH-23390) in response omission Go trials.** (a) Mean number of  
 response omission errors made across rats across sessions when each session is split into quartiles. (b) Mean time in  
 408 nosepoke from cue onset in response omission trials. (e) Mean time in the area of the nosepoke (see *Methods:*  
*Video Analyses*). (c, d, f, g) Mean probability density across rats in small (lower) or large (upper) reward Go trials,  
 410 when (c) correct on the high dose of the intra-NAcC D1 antagonist, (d) correct on vehicle, (f) in response omission  
 trials on the high dose of the intra-NAcC D1 antagonist and (g) in response omission trials on vehicle. (h) Total

412 number of single lever presses in response omission trials. (i) Average entropy of animals in response omission trials.  
414 Data displayed for all animals for which we had tracking, but statistical analysis was restricted to n=5 for which we  
416 had a reliable tracking in both drug and vehicle sessions.

416

418

## Discussion

420 Dopamine transmission is a key component mediating the influence of reward predictions on behaviour,  
yet its precise role in cue-driven behavioural control has remained contentious (Averbeck & Costa, 2017;

422 Gershman & Uchida, 2019; Robbins & Everitt, 2007; Salamone & Correa, 2012; Walton & Bouret, 2019).

Here we used a factorial design, which separately manipulated the size of the reward on offer and the

424 behavioural requirements to gain that reward, to investigate the role of dopamine transmission at D1Rs in  
regulating this relationship. Stimulation, but not blockade, of D1Rs across the whole brain or locally in the

426 NAcC consistently disrupted No-Go performance, potentiating inappropriate responses that clustered  
strongly just after cue presentation. The most prominent effect of D1R blockade, by contrast, was to

428 increase response omissions on Go trials. While this manifested as a general reduction of invigoration of  
all distal actions in the response sequence after systemic administration (action initiation and travel time

430 latencies, but not reward collection), this was not observed after intra-NAcC blockade where on correctly  
performed trials these metrics were unaffected. Instead, the disruption of transmission at NAcC D1Rs

432 increased the probability that Go trial performance was in an “unfocused” state, characterised, both on  
and off drug, by a reduction in the precision of responding even though the appropriate action sequence

434 was often executed.

The prospect of reward can positively shape both the speed and precision of behaviour (Guitart-Masip,

436 Duzel, Dolan, & Dayan, 2014; Kawagoe, 1998; Manohar et al., 2015; Shadmehr, Reppert, Summerside,  
Yoon, & Ahmed, 2019), and several lines of evidence suggest that dopamine may play a key role in

438 mediating aspects of both processes (Beierholm et al., 2013; Hamid et al., 2015; Manohar et al., 2015; Niv  
et al., 2007; Westbrook et al., 2020). As expected, rats’ performance in the current experiment was also

440 strongly affected by the reward size on offer. Cues associated with a large future reward reduced latencies  
to initiate actions and to complete each prerequisite element of the action sequence (the correct lever on  
442 a Go trial and, on both trial types, the food magazine).

This finding is consistent with the notion that there is a direct link between the vigour of actions – the  
444 reciprocal of the time to complete an action sequence (Shadmehr et al., 2019) – and the net gain from  
obtaining the potential reward (Niv et al., 2007; Pompilio & Kacelnik, 2010; Shadmehr, Huang, & Ahmed,  
446 2016). However, there was an asymmetric influence on response accuracy, with the prospect of a large  
reward improving Go trial accuracy by reducing the likelihood that animals would fail to make a response  
448 in the allotted time window, but having no reliable effect successful No-Go trial completion. This could be  
caused by reward having distinct influences on separable processes during No-Go trials, boosting not only  
450 instrumental precision but also a Pavlovian influence to approach rewarded locations, which here is  
maladaptive (Lex & Hauber, 2010). Indeed, in No-Go trials, where animals exited the nosepoke prematurely  
452 we found that the rats were more likely to approach the food magazine, particularly when the large reward  
was on offer (Supplementary Fig. 3). A related mechanistic alternative is that the rats have learned through  
454 action to limit how reward modulates cue-driven dopamine on No-Go trials to avoid premature responses.  
While the presentation of cues associated with future reward can rapidly increase dopamine levels in  
456 terminal regions in relation to the value of available reward (or, more specifically, the *change* in benefit  
signalled by the cue compared to previous expectation) (Gan et al., 2010; Tsutsui-kimura et al., 2020), we  
458 and others have found using fast-scan cyclic voltammetry that release patterns are suppressed until a  
reward-seeking action is made to gain that benefit (Roitman et al., 2004; Syed et al., 2016).

460 What is in no doubt though is that pharmacological stimulation of D1Rs rapidly promoted actions to be  
initiated, typically speeding action initiation on Go trials, but also consistently increasing inappropriate No-  
462 Go responses. Notably, these latter premature actions were most evident early in the No-Go holding period  
just after cue presentation; but if the animal was able to withhold responding at this point, it was often no

464 more likely to make an error in the second half of the holding period than off drug. Moreover, neither  
systemic nor intra-NAcC D1R stimulation caused an increase in head exits during the pre-cue period,  
466 implying that it was cue presentation that elicited the behavioural response.

While these findings are generally consistent with studies implicating hyperdopaminergic states with an  
468 increased likelihood of motor or 'waiting' impulsivity (Pattij et al., 2007; Pezze et al., 2007), it is important  
to note that the mechanisms of behavioural control taxed in the current task, where animals have to  
470 suppress responding before and during the presentation of a reward-associated cue, may well be distinct  
from those in tasks such as the 5-choice serial reaction time task (5-CSRTT), which requires animals to wait  
472 until a cue is presented. For example, D1R stimulation does not always increase premature responses in  
the 5-CSRTT (Passetti, Levita, & Robbins, 2003; Pezze et al., 2007). Conversely, intra-NAcC D1R blockade  
474 has been shown to reduce premature responses on the 5-CSRTT (Pattij et al., 2007), but here had no effect  
on No-Go performance. This demonstrates that although activity at D1Rs can promote cue-driven decisions  
476 to act, it is not necessary for actions to be executed. Finally, we have reported that intra-NAcC  
administration of the stimulant amphetamine causes a much broader range of premature responses than  
478 observed in the current study, with increases in impulsive actions observed not only throughout the early  
and late intervals of the No-Go holding period but also in the pre-cue period (Harmson, Grima, Panayi,  
480 Husain, & Walton, 2020).

Overall, our data support the idea that D1Rs, likely mediated by those within the NAcC, enable cues  
482 signalling reward opportunities to promote transitions to action. This is consistent with findings that cue-  
evoked excitation of D1-expressing MSNs is closely tied to the latency to initiate reward-seeking behaviour  
484 (du Hoffmann & Nicola, 2014; Nicola, 2010; Saunders, Richard, Margolis, & Janak, 2018). Of particular  
relevance, in one recent study, du Hoffmann and Nicola showed that intra-NAcC administration of D1  
486 agonists promoted the likelihood of cue-driven behaviour for sucrose reward in a state of satiety (du  
Hoffmann & Nicola, 2016), which several groups, including our own, have shown attenuates dopamine



488 release to cues signalling the potential availability of sucrose reward (Aitken, Greenfield, & Wassum, 2016;  
Papageorgiou et al., 2016). Moreover, as in these previous studies, it appears that NAcC D1Rs play a specific  
490 role in invigorating the initiation of an action sequence, but then have little influence over the vigour of  
ongoing actions, with the time to reach the lever or collect the reward unaffected by either D1R blockade  
492 or inhibition. This contrasts with the effects of systemic manipulation of D1Rs, which not only affected  
initiation latencies but also the speed of lever approach (though not reward retrieval). One possibility is  
494 that regulation of the movement vigour, particularly in the service of gaining response-contingent rewards,  
relies on D1Rs in dorsal striatum (Baraduc, Thobois, Gan, Broussolle, & Desmurget, 2013; Grogan, Sandhu,  
496 Hu, & Manohar, 2020; Panigrahi et al., 2015). Notably, both optogenetic inhibition and stimulation of  
substantia nigra pars compacta dopamine cells or D1-expressing MSNs have been shown to disrupt ongoing  
498 movements (Bova et al., 2020; Tecuapetla, Jin, Lima, & Costa, 2016), which parallels the effect observed  
here that systemic administration of not just the D1R antagonist but also the D1R agonist slowed travel to  
500 the lever. The latter manipulation also caused a small but reliable increase in incorrect lever presses on  
Go trials, and both effects may reflect competition between different potential reward-associated  
502 instrumental responses in dorsal striatum (Bova et al., 2020).

Given the importance of NAcC D1Rs in regulating decisions to act, it might initially seem entirely expected  
504 that intra-NAcC D1R blockade would also cause an increase in the proportion of response omissions on Go  
trials, comparable to what had been observed after systemic administration. However, two aspects of this  
506 make it more surprising. First, a number of elegant experiments have shown that NAcC dopamine  
transmission is only important for flexible or taxic responses – in other words, when needing to take a novel  
508 path to gain reward (Nicola, 2010) – yet here the start and goal locations are fixed across trials. Second,  
this increase in omissions occurred alongside an absence of an effect on any latency measures on correctly  
510 performed trials. This could not be explained by a simple arousal effect causing animals to become  
increasingly amotivated over time, for instance if the D1R antagonist reduced the efficacy of rewards to

512 sustain behaviour (Fischbach & Janak, 2019) or the animal's intrinsic motivation was reduced by satiety (du  
Hoffmann & Nicola, 2016; Papageorgiou et al., 2016), as omission error rates were comparable from the  
514 start to the end of the session. Moreover, there was no evidence that the rats were simply disorganised or  
disengaged during omissions after D1R administration; not only was there no increase in wrong lever  
516 choices but also, strikingly, analysis the patterns of responding in a subset of animals on these trials showed  
that they performed many of the same action sequence components observed on correctly performed Go  
518 trials including movement to the cued lever and, on a notable proportion of trials, then towards the food  
magazine as if to retrieve reward.

520 Instead, what characterised performance on response omissions was a marked reduction in vigour and  
precision in the execution of the response sequence: slower initiation, less focused responses towards the  
522 correct lever, increased likelihood of only making one of the two required lever presses. Crucially, this  
unfocused state had not emerged *de novo* with administration of the intra-NAcC D1R antagonist, but  
524 instead was a potentiation of an analogous response pattern also observed off drug. Response omissions  
in baseline sessions most commonly occurred on small reward trials, which generate an initial dip in NAcC  
526 dopamine (Syed et al., 2016). This suggests that endogenous rapid dopamine release, such as occurs when  
cues signal an improved reward opportunity, play a key role in promoting transitions to focused and  
528 efficient responding. In the absence of dopamine, it becomes more likely that animals will act in an  
unfocused state, as was demonstrated by the increase of single lever presses and overall entropy when  
530 animals omit responding in Go trials, which fails to ensure each element of the required sequence is  
completed efficiently and in order. This may be relevant for understanding the actions of therapeutic doses  
532 of stimulant drugs such as amphetamine, which can potentiate evoked NAcC dopamine and increase  
sustained attention (Andrzejewski et al., 2014; Schuweiler, Athens, Thompson, Vazhayil, & Garris, 2018).  
534 Nonetheless, it is important to note that stimulation of NAcC D1Rs did not concomitantly increase the

536 success rate on Go Small reward trials. This demonstrates that whilst D1R transmission is necessary to facilitate transitions to focused reward seeking, it is not sufficient in the absence of other inputs.

538 Pronounced changes in dopamine can increase the excitability of D1-expressing MSNs (du Hoffmann & Nicola, 2014; Lahiri & Bevan, 2020; Lee et al., 2020) and therefore we focused our investigations on the downstream effects of cue-elicited dopamine on D1Rs. Nonetheless, several studies have also demonstrated important roles for D2Rs for sustaining responding and neural activity in NAcC D2-expressing MSNs evoked by reward-associated cues (du Hoffmann & Nicola, 2014; Lex & Hauber, 2010; Nicola, 2010). We therefore also compared at a systemic level the effects of low-to-moderate doses of a D2/D3-receptor agonist quinpirole and a D2-receptor antagonist eticlopride. While D2 blockade had no reliable effect on any measure, stimulation of D2/D3Rs strongly disrupted Go trials, slowing all movements in the sequence, including reward collection, and at the highest dose substantially increasing the proportion of response omissions. However, it was not simply that the animals' movement was impaired as they also showed an increase in premature head exits during the pre-cue period. This could partly reflect an effect of the agent on D2 autoreceptors causing a reduction in midbrain dopamine activity and dopamine release likelihood (Bunney, Walters, Roth, & Aghajanian, 1973; Marcott, Mamaligas, & Ford, 2014; Schmitz, Schmauss, & Sulzer, 2002), although it is notable that the effects of D2R stimulation are partially distinct from D1R (and D2R) blockade. An alternative possibility is that it reflects the fact that D2-expressing MSNs encode the anticipated costs of acting or the value of alternative options (Collins & Frank, 2014; Tecuapetla et al., 2016). However, future studies, specifically targeting NAcC D2Rs would be required to disentangle these possible explanations.

556 Together, these results help refine ideas about the role of mesolimbic dopamine, acting via NAcC D1Rs, in reward-guided choice: it is not required to sustain appropriate selection *between* options, but instead plays a key role in the rapid translation of information about the potential net gain of a presented opportunity into a decision to act (Walton & Bouret, 2019). In addition, our data highlight an important requirement for

dopamine acting at NAcC D1Rs in enabling rewards to promote transitions to a vigorous and focused  
560 reward-seeking state to allow animals to efficiently achieve their goal. In the former case, activity at NAcC  
D1Rs increases the likelihood of transitioning to action; in the latter, an absence of activity increases the  
562 likelihood of transitioning to an unfocused response state. Therefore, an appropriate balance of activity at  
NAcC D1Rs is critical to regulate efficient reward seeking. Future studies that employ techniques with  
564 greater temporal specificity than is achievable using pharmacology will be helpful to refine this theory.

## 566 **Materials and Methods**

### *Subjects*

568 All procedures were carried out in accordance with the UK Animals (Scientific Procedures) Act (1986). Two  
cohorts of adult (aged between 8 and 12 weeks at the beginning of training) male Sprague Dawley rats  
570 (Harlan, UK) were used in the described studies. Cohort 1 consisted of 11 rats that had previously been  
implanted for use in an FCV study (Syed et al., 2016), and Cohort 2 consisted of 14 naïve rats. Table 1  
572 outlines which cohorts were used for each pharmacological manipulation, as well as numbers and  
exclusions for each experiment. Note that the rats in Cohort 1 also received the D1R antagonist  
574 systemically, but due to issues with the drug preparation, the incorrect doses were administered and the  
dataset was excluded. No statistical methods were used to pre-determine sample sizes, but sample sizes  
576 are comparable to those reported in previous publications. All animals were maintained on a twelve-hour  
light/dark cycle. All testing was carried out during the light phase, and during training and testing periods  
578 animals were food restricted to 85-90% of their free-feeding weight. Water was provided ad libitum in the  
home cage.

580

| Experiment                        | Cohort | Original n | Results n | Reason for Exclusions                          |
|-----------------------------------|--------|------------|-----------|------------------------------------------------|
| Systemic D1 agonist               | 1      | 11         | 11        | –                                              |
| Systemic D1 antagonist            | 1      | 11         | –         | Incorrect dosing of drug                       |
| Systemic D2 agonist               | 1      | 11         | 9         | Computer failure (n=2)                         |
| Systemic D2 antagonist            | 1      | 11         | 10        | Computer failure (n = 1)                       |
| Systemic D1 agonist (replication) | 2      | 14         | 14        | –                                              |
| Systemic D1 antagonist            | 2      | 14         | 13        | Performance (n=1)                              |
| Local D1 agonist                  | 2      | 14         | 13        | Misplaced cannulae (n = 1)                     |
| Local D1 antagonist               | 2      | 14         | 12        | Misplaced cannulae (n=1),<br>Performance (n=1) |

582 **Table 1.** Experimental details, sample sizes and reasons for exclusions. In the case of ‘performance’ exclusions,  
584 subjects were excluded if they completed <20% of trials in a session (n = 2 across all experiments).

#### *Apparatus and behavioural training*

586 Animals were trained on an operant Go/No-Go task (Fig. 1a, b) in which, after initiating a trial by making a  
nosepoke, auditory cues instructed them either to make (Go) or withhold (No-Go) action in order to gain  
588 either a small or large reward. Experiments were conducted using MED-PC behavioural chambers fitted on  
one wall with two retractable levers 9.5cm on either side of a central nosepoke, and a food magazine on  
590 the opposite wall into which 45mg sucrose pellets (Test Diet, Sandown Scientific, UK) were dispensed. Both  
the nosepoke and food magazine were fitted with infrared beams for entry detection. Each chamber was  
592 also fitted with a speaker for delivering the 4 auditory stimuli (~70dB tone, buzz, white noise, or clicker)  
and a house light.

594 After magazine training, animals were first trained on the No-Go trial type. On these trials, the rat was  
required to remain in the nosepoke for the required period. The No-Go duration was incrementally  
596 increased across training sessions on reaching the behavioural criterion ( $\geq 60\%$  success rate) up to a jittered  
pre-cue period of 0.3-0.7s and a maximum cued hold period of 1.5-1.7s. A 0.1s ‘buffer’ period was also  
598 introduced to distinguish between genuine nosepoke exists and small shifts in posture that may have

inactivated the poke detector. Successful trials were rewarded with either one (small reward) or two (large  
600 reward) sucrose pellets, as cued by the auditory stimulus.

After reaching criterion for both No-Go trial types, animals were next trained on the Go trial type. Mirroring  
602 the No-Go trials, correct choice of one lever (either left or right, side counterbalanced across animals) was  
rewarded with one pellet (small reward), whilst the other was rewarded with two pellets (large reward),  
604 again cued by the auditory stimulus. After again reaching criterion, No-Go trials were interleaved with Go  
trials to give the full task, in which animals experienced all four trial types pseudorandomly.

606

### *Behavioural task*

608 In the full Go/No-Go task (Fig. 1a, b), animals initiated a trial by entering and remaining in the nosepoke for  
the pre-cue hold period (0.3-0.7s). This then resulted in presentation of one of 4 auditory cues that  
610 indicated the action required (Go or No-Go) and the size of the reward on offer (small or large). Cues were  
counterbalanced across animals. In No-Go trials, the cue sounded until the end of the hold period or, if the  
612 rats exited the nosepoke prematurely, until the time of exiting the poke. In Go trials, the cue sounded until  
animals pressed the correct lever twice, or until they pressed the wrong lever, or for a maximum of 5s if  
614 they failed to press any lever (response omissions).

On correct trials, rewards were delivered 1s after successful completion of a trial (remaining in the  
616 nosepoke for the No-Go period on No-Go trials or making 2 correct lever presses on Go trials). After reward  
delivery a 5s inter-trial interval (ITI) commenced. No cue indicated the end of the ITI and animals were free  
618 to initiate the next trial after this time. Both failed Go and No-Go trials resulted in the house light  
illuminating for a 5s time-out period 1s after the error before turning off and the 5s ITI commencing. The  
620 session ended after animals had either gained 100 rewards or after 60 minutes.

622 *Behavioural measures*

All measures were calculated on a session-by-session basis. Performance in this study for each trial type  
624 was expressed as percentage success over all attempted trials within a session. On Go trials, animals could  
make an error by either selecting the incorrect lever ('WRONG LEVER'), or by omitting responding  
626 ('RESPONSE OMISSION'). On No-Go trials, animals could only make an error by exiting the nosepoke before  
the end of the cued holding period ('PREMATURE EXIT'). We reasoned that such premature responses could  
628 result from either a failure to inhibit fast cue-driven responses, or from a failure to wait for the appropriate  
time period before initiating a response. As the former would result in premature responses clustered near  
630 cue presentation, and the latter in failures near the end of the holding period, we chose to separately  
quantify these errors as those occurring in the first ('EARLY', < 800ms) or second ('LATE', > 800ms) half of  
632 the No-Go holding period. This was calculated as a proportion of all No-Go nosepoke exits in that session.  
As an additional metric of impulsive responding, we also measured the number of head exits made during  
634 the pre-cue period (after a nosepoke was made to initiate a trial, but before a cue was presented), which  
were termed ABORTED trials.

636 Key task latencies in all successful trials included: (a) **ACTION INITIATION**: cue onset to nosepoke exit (NB.  
on Go trials, this did not include trials in which animals remained in the nosepoke >1.7s, i.e. indicating that  
638 the Go trial was interpreted as No-Go trial), (b) **TRAVEL TIME (Go trials only)**: time from nosepoke exit to  
first lever press; and (c) **REWARD RETRIEVAL**: time from reward delivery to magazine entry. Additionally,  
640 we calculated (d) **RE-ENGAGEMENT**: latency from magazine entry to re-entering the nosepoke (after a  
successful trial, and regardless of whether this was during or after the ITI).

642

644

### *Video tracking*

646 Videos were captured at 25 fps and video tracking was performed using the DeepLabCut toolbox (Mathis  
et al., 2018). Two separate models with matching parameters were trained to account for differences in  
648 box orientation and nodes included the rats' nose, ears, head, body, legs, and tail, as well as key features  
of the operant chambers – the nosepoke, left and right levers, and left and right corners of the food  
650 magazine. For each video, 25 randomly selected frames were manually labelled before the network was  
trained and tested over 1030000 iterations, resulting in an average tracking error of < 5 pixels. After  
652 training, only frames with co-ordinates that had a likelihood of 1 were included and any missed frames  
were interpolated across. These co-ordinates were aligned with MED-PC behaviour data by identifying  
654 when animals made errors in the task; errors resulted in the houselight being turned on such that the  
average luminance values from greyscale converted video frames increased sharply, and were therefore  
656 identifiable using the inbuilt MATLAB 'findpeaks' function. As the camera system had not originally been  
set up with the intention of performing such granular analyses, a number of sessions had to be excluded  
658 due to suboptimal video quality. Reasons for excluding a session included a failure to align tracking with  
MED-PC behaviour, poor visibility of operant chamber features, and sessions in which a majority of frames  
660 required interpolation. X and y co-ordinates from the tracked nose marker were used for all analyses. Any  
negative values in the y axis were due to the rat having its nose in the nosepoke and were therefore  
662 converted to 0.

### *Video analyses*

We normalised the values of operant chamber parts on a per session basis by subtracting the median co-  
666 ordinates of the nosepoke from the values of the tracked parts. For all behavioural metrics relating to  
analysis of rat location in the chamber relative to chamber components (aside from the calculation of



668 entropy – explained below), we first divided the range of box space co-ordinates into a 3 x 3 grid, allowing  
for two squares of the grid to be labelled as lever squares, one as a nosepoke square, and one as a magazine  
670 square. For each frame, if a given co-ordinate was within the boundaries of a square it was scored as '1', or  
'0' otherwise. This was averaged across to give a mean probability density function, or probability, across  
672 trials for each rat, and then averaged across rats. To calculate the time spent in the area of the nosepoke  
we measured the latency from the beginning of the trial to when the animals were detected to have left  
674 this square based on the tracked nose co-ordinates being outside of the boundary of the nosepoke square.  
To calculate the proportion of trials on which animals completed a particular sequence of actions, e.g.  
676 moving from the correct lever to the food magazine, we again used this binary measure of whether the  
tracked co-ordinates had entered within the specified squares but in addition specified a required order of  
678 visitation for the trial to be counted as such. Trajectory lengths were calculated by finding the Euclidean  
distance between frames and normalised by the median distance between the lever markers before being  
680 summed and averaged. For the calculation of entropy, we divided the range of box space co-ordinates into  
an 18 x 18 grid in order to increase the granularity of the analysis. We then normalised the probability  
682 values of each location,  $L$ , in the grid on a per session basis before calculating entropy using the Shannon  
equation (Shannon, 1948) for each session as:  $E = -\sum p_L \log_2 p_L$ . For the colourplot visualisations in Fig.  
684 6 and Fig. 8, the box boundaries were reduced by 50 pixels along the x axis as very few tracking points  
reached those co-ordinates.

686

### *Pharmacological challenges*

688 SKF 81297 hydrobromide (Tocris Bioscience; D1R agonist) was administered systemically at doses of 0.3  
mg/kg and 1.0 mg/kg, and locally at doses of 0.4  $\mu\text{g}/\mu\text{l}$  and 4.0  $\mu\text{g}/\mu\text{l}$ . SCH 23390 hydrochloride (Tocris  
690 Bioscience; D1R antagonist) was administered systemically at doses of 0.005mg/kg and 0.01mg/kg, and  
locally at doses of 0.2 $\mu\text{g}/\mu\text{l}$  and 2.0 $\mu\text{g}/\mu\text{l}$ . Quinpirole hydrochloride (Tocris Bioscience; D2R agonist) was

692 administered systemically at doses of 0.0125 mg/kg and 0.0375 mg/kg, and eticlopride hydrochloride  
(Tocris Bioscience; D2R antagonist) was administered systemically at doses of 0.01 mg/kg and 0.03 mg/kg.  
694 Doses were calculated as the salt. All drugs were dissolved in 0.9% sterile saline, made in batch, aliquoted,  
and frozen at -20°C. Individual aliquots were defrosted for use on testing days. 0.9% sterile saline was  
696 administered in control sessions. In all experiments, doses were applied in a counterbalanced Latin square  
approach, although blinding was not used when making up or applying agents.

698

### *Surgical procedure*

700 To implant cannulae targeting the NAcC, rats were anaesthetised using inhaled isoflurane (4% vol/vol in O<sub>2</sub>  
induction and 1.5% for maintenance delivered via facemask) and administered buprenorphine (Vetergesic,  
702 0.03 mg/kg, s.c.), meloxicam (Metacam, 2mg/kg, s.c.) and 3ml glucosaline (Aquapharm). Body temperature  
was maintained at 37±0.5°C by a homeothermic heating blanket. Once animals were secured in a  
704 stereotaxic frame (Kopf Instruments) and their scalp shaved and cleaned with dilute hibiscrub and 70%  
alcohol, a local anaesthetic (bupivacaine, 2mg/kg) was administered to the incision site. Eye gel (Lacri-  
706 Lube, Allergan) was applied to the eyes for protection. The skull was then exposed and the skull was levelled  
based on measurements of Bregma and Lambda. Six holes were drilled: two for implantation of bilateral  
708 guide cannulae (Plastics One, UK) and four for anchoring screws (Precision Technology Supplies). Guide  
cannulae were then lowered. The cannulae consisted of an 8mm plastic pedestal holding two 26-gauge  
710 metal tubes with a centre-to-centre distance of 3.4mm and a length of 7.5mm. They were implanted 1.5mm  
above the target site of the NAcC, at co-ordinates of AP relative to bregma: +1.4mm, ML: ±1.7mm, DV: -  
712 6.0mm from surface of skull relative to bregma. Dental acrylic (Associated Dental Products Ltd.) was then  
applied to secure the cannulae to the skull and screws. After surgery, bilateral dummy cannulae were  
714 inserted to ensure patency, and a dustcap was secured to the pedestal. Animals were again administered

buprenorphine, meloxicam, and glucosaline post-surgery, and meloxicam was given up to a further three  
716 days post-surgery. Animals were group housed after initial recovery and began re-training once they were  
fully recovered, on average two weeks after surgery.

718

#### *Systemic administration procedure*

720 Drugs were injected intraperitoneally (i.p.) at a volume of 1 ml/kg bodyweight. All drugs were injected 10  
minutes before the behavioural session aside from the D1R antagonist, which was administered 20 minutes  
722 before the start of the session. Drug administration sessions were separated by at least one treatment-  
free training day to ensure a return to baseline performance and complete washout of the drug, with  
724 criteria of  $\geq 60\%$  successful trials across all trial types, and session completion within 60 minutes. If these  
criteria were not met, animals continued with treatment-free training days until performance reach  
726 criteria, at which point the next testing day commenced, though in practice animals' performance almost  
always reached criteria at the first training day.

728

#### *Local administration procedure*

730 A mock infusion was carried out one day prior to the first experimental session to reduce potential tissue  
damage-related confounds. This involved insertion of the injectors back-filled with saline without infusion  
732 of any substance. The following day two 10 $\mu$ l glass Hamilton syringes were back-filled with 0.9% sterile  
saline and placed in an infusion pump (Cole-Parmer). Double connector assembly tubing (Plastics One, UK)  
734 was cleaned with ethanol and thoroughly dried with air, then filled with saline before being attached to the  
Hamilton syringes. 33-gauge 9mm bilateral injectors (Plastics One, UK) that had been cleaned by sonication  
736 for one hour in 70% ethanol were then attached to the connector assembly. A small air bubble separated  
the saline from drug. The injectors were checked for blockage before the rats were gently restrained, their

738 dummy cannulae removed, and injectors inserted. During infusion, 0.5 $\mu$ l of solution was injected per  
hemisphere at 0.25 $\mu$ l/minute. Injectors were left in place for a further two minutes after infusion and then  
740 removed. The dummy cannulae and dustcap were replaced and rats were returned to their homecage for  
10 minutes before beginning the task.

742

#### *Data analysis*

744 All datasets are available from the corresponding authors on reasonable request. Data was extracted and  
analysed using MATLAB R2018a and IBM SPSS Statistics 24. Significant interactions were explored by  
746 analysis of the simple effects and are reported in the appropriate figure legends or tables. Randomisation  
or blinding was not used during analysis.

748

#### *Histology*

750 At the end of data collection, cannulated animals were deeply anaesthetised with sodium pentobarbitone  
(200mg/kg, i.p. injection) and transcardially perfused with 0.9% saline followed by a 10% formalin solution  
752 (vol/vol). Brains were kept in 10% formalin solution until being sectioned. Brains were sectioned into 60 $\mu$ m-  
thick coronal sections by vibratome (Leica). The sections were stained with cresyl violet (Sigma Aldrich)  
754 before being mounted in DePeX mounting medium onto 1.5% gelatin-coated slides and enclosed with  
coverslips to confirm cannulae placements (Supp. Fig. 4).

756

758

760

762 **Acknowledgements**

We would like to thank Greg Daubney for help with histology. This work was supported by Wellcome  
764 (fellowships WT090051MA and 202831/Z/16/Z to MEW, 206330/Z/17/Z to MH), the ESRC (award  
ES/J500112/1 to LLG) and the Clarendon and the Archimedes Foundation (awards  
766 SFF1819\_CB2\_MSD\_1196514 and Kristjan Jaagu scholarship to OH). The authors declare no competing  
financial interests. For the purpose of open access, the author has applied a CC BY public copyright license  
768 to any Author Accepted Manuscript version arising from this submission.

770 **Author Contributions**

LLG, MH and MEW conceived the project. LLG, ES and OH trained the animals. LLG performed the surgeries  
772 with assistance from MCP and OH. LLG collected the data, with assistance from MCP for the local infusion  
studies. LLG and MEW analysed the data with input from MCP and SGM. LLG and MEW prepared the  
774 manuscript with input from all the other authors.

776

## References

- 778 Aitken, T. J., Greenfield, V. Y., & Wassum, K. M. (2016). Nucleus accumbens core dopamine signaling  
780 tracks the need-based motivational value of food-paired cues. *Journal of Neurochemistry*, *136*(5),  
1026–1036. <https://doi.org/10.1111/jnc.13494>
- 782 Andrzejewski, M. E., Spencer, R. C., Harris, R. L., Feit, E. C., McKee, B. L., & Berridge, C. W. (2014). The  
784 effects of clinically relevant doses of amphetamine and methylphenidate on signal detection and  
DRL in rats. *Neuropharmacology*, *79*, 634–641. <https://doi.org/10.1016/j.neuropharm.2014.01.018>
- 786 Averbek, B. B., & Costa, V. D. (2017). Motivational neural circuits underlying reinforcement learning.  
788 *Nature Neuroscience*, *20*(4), 505–512. <https://doi.org/10.1038/nn.4506>
- 790 Baraduc, P., Thobois, S., Gan, J., Broussolle, E., & Desmurget, M. (2013). A common optimization principle  
792 for motor execution in healthy subjects and parkinsonian patients. *Journal of Neuroscience*, *33*(2),  
665–677. <https://doi.org/10.1523/JNEUROSCI.1482-12.2013>
- 794 Beierholm, U., Guitart-Masip, M., Economides, M., Chowdhury, R., Düzel, E., Dolan, R., & Dayan, P. (2013).  
Dopamine modulates reward-related vigor. *Neuropsychopharmacology*, *38*(8), 1495–1503.  
796 <https://doi.org/10.1038/npp.2013.48>
- 798 Bogacz, R. (2020). Dopamine role in learning and action inference. *ELife*, *9*, e53262.  
<https://doi.org/10.7554/eLife.53262>
- 800 Bova, A., Gaidica, M., Hurst, A., Iwai, Y., Hunter, J., & Leventha, D. K. (2020). Precisely-timed dopamine  
802 signals establish distinct kinematic representations of skilled movements. *ELife*, *9*, e61591.  
<https://doi.org/10.7554/eLife.61591>
- 804 Bunney, B. S., Walters, J. R., Roth, R. H., & Aghajanian, G. K. (1973). Dopaminergic neurons: effect of  
806 antipsychotic drugs and amphetamine on single cell activity. *The Journal of Pharmacology and  
Experimental Therapeutics*, *185*(3), 560–571.
- 808 Coddington, L. T., & Dudman, J. T. (2018). The timing of action determines reward prediction signals in  
810 identified midbrain dopamine neurons. *Nature Neuroscience*, *21*(11), 1563–1573.  
<https://doi.org/10.1038/s41593-018-0245-7>
- 812 Collins, A. G. E., & Frank, M. J. (2014). Opponent actor learning (OpAL): Modeling interactive effects of  
814 striatal dopamine on reinforcement learning and choice incentive. *Psychological Review*, *121*(3),  
337–366. <https://doi.org/10.1037/a0037015>
- 816 Collins, A. L., Aitken, T. J., Greenfield, V. Y., Ostlund, S. B., & Wassum, K. M. (2016). Nucleus accumbens  
818 acetylcholine receptors modulate dopamine and motivation. *Neuropsychopharmacology*, *41*(12),  
2830–2838. <https://doi.org/10.1038/npp.2016.81>
- 820 Costa, V. D., Mitz, A. R., & Averbek, B. B. (2019). Subcortical Substrates of Explore-Exploit Decisions in  
822 Primates. *Neuron*, *103*(3), 533-545.e5. <https://doi.org/10.1016/j.neuron.2019.05.017>

- 824 Dalley, J. W., & Roiser, J. P. (2012). Dopamine, serotonin and impulsivity. *Neuroscience*, *215*, 42–58.  
<https://doi.org/10.1016/j.neuroscience.2012.03.065>
- 826 Dayan, P. (2012). Instrumental vigour in punishment and reward. *European Journal of Neuroscience*,  
828 *35*(7), 1152–1168. <https://doi.org/10.1111/j.1460-9568.2012.08026.x>
- 830 Dreher, J. K., & Jackson, D. M. (1989). Role of D1 and D2 dopamine receptors in mediating locomotor  
832 activity elicited from the nucleus accumbens of rats. *Brain Research*, *487*(2), 267–277.  
[https://doi.org/10.1016/0006-8993\(89\)90831-7](https://doi.org/10.1016/0006-8993(89)90831-7)
- 834 du Hoffmann, J., & Nicola, S. M. (2014). Dopamine invigorates reward seeking by promoting cue-evoked  
836 excitation in the nucleus accumbens. *Journal of Neuroscience*, *34*(43), 14349–14364.  
<https://doi.org/10.1523/JNEUROSCI.3492-14.2014>
- 838 du Hoffmann, J., & Nicola, S. M. (2016). Activation of dopamine receptors in the nucleus accumbens  
840 promotes sucrose-reinforced cued approach behavior. *Frontiers in Behavioral Neuroscience*, *10*,  
144. <https://doi.org/10.3389/fnbeh.2016.00144>
- 842 Fallon, S. J., Smulders, K., Esselink, R. A., van de Warrenburg, B. P., Bloem, B. R., & Cools, R. (2015).  
844 Differential optimal dopamine levels for set-shifting and working memory in Parkinson’s disease.  
*Neuropsychologia*, *77*, 42–51. <https://doi.org/10.1016/j.neuropsychologia.2015.07.031>
- 846 Fischbach, S., & Janak, P. H. (2019). Decreases in Cued Reward Seeking After Reward-Paired Inhibition of  
848 Mesolimbic Dopamine. *Neuroscience*, *412*, 259–269.  
<https://doi.org/10.1016/j.neuroscience.2019.04.035>
- 850 Floresco, S. B. (2015). The Nucleus Accumbens: An Interface Between Cognition, Emotion, and Action.  
*Annual Review of Psychology*, *66*(1), 25–52. <https://doi.org/10.1146/annurev-psych-010213-115159>
- 852 Friston, K. J., Shiner, T., FitzGerald, T., Galea, J. M., Adams, R., Brown, H., Dolan, R. J., Moran, R., Stephan,  
854 K. E., & Bestmann, S. (2012). Dopamine, affordance and active inference. *PLoS Computational  
Biology*, *8*(1): e1002327. <https://doi.org/10.1371/journal.pcbi.1002327>
- 856 Gan, J. O., Walton, M. E., & Phillips, P. E. M. (2010). Dissociable cost and benefit encoding of future  
858 rewards by mesolimbic dopamine. *Nature Neuroscience*, *13*, 25–27.  
<https://doi.org/10.1038/nn.2460>
- 860 Gershman, S. J., & Uchida, N. (2019). Believing in dopamine. *Nature Reviews Neuroscience*, *20*, 703–714.  
862 <https://doi.org/10.1038/s41583-019-0220-7>
- 864 Grogan, J. P., Sandhu, T. R., Hu, M. T., & Manohar, S. G. (2020). Dopamine promotes instrumental  
866 motivation, but reduces reward-related vigour. *ELife*, *9*(e58321).  
<https://doi.org/10.1101/2020.03.30.010074>
- 868 Guitart-Masip, M., Duzel, E., Dolan, R., & Dayan, P. (2014). Action versus valence in decision making.  
*Trends in Cognitive Sciences*, *18*(4), 194–202. <https://doi.org/10.1016/j.tics.2014.01.003>
- 870 Hamid, A. A., Pettibone, J. R., Mabrouk, O. S., Hetrick, V. L., Schmidt, R., Vander Weele, C. M., ... Berke, J.

- 872 D. (2015). Mesolimbic dopamine signals the value of work. *Nature Neuroscience*, *19*(1), 117–126.  
<https://doi.org/10.1038/nn.4173>
- 874 Harmson, O., Grima, L. L., Panayi, M. C., Husain, M., & Walton, M. E. (2020). *BioRxiv*. 5-HT<sub>2c</sub> receptors  
876 regulate the balance between instrumental vigour and restraint.  
<https://doi.org/10.1101/2020.12.13.422360>
- 878 Hollon, N. G., Arnold, M. M., Gan, J. O., Walton, M. E., & Phillips, P. E. M. (2014). Dopamine-associated  
880 cached values are not sufficient as the basis for action selection. *Proceedings of the National  
Academy of Sciences of the United States of America*, *111*(51), 18357–18362.  
<https://doi.org/10.1073/pnas.1419770111>
- 882 Hughes, R. N., Bakhurin, K. I., Petter, E. A., Watson, G. D., Kim, N., Friedman, A. D., & Yin, H. H. (2020).  
884 Ventral tegmental dopamine neurons control the impulse vector during motivated behavior. *Current  
Biology*, *30* (14), 2681–2694. <https://doi.org/10.1016/j.cub.2020.05.003>
- 886 Humphries, M. D., Khamassi, M., & Gurney, K. (2012). Dopaminergic control of the exploration-  
888 exploitation trade-off via the basal ganglia. *Frontiers in Neuroscience*, *6* (9), 1–14.  
<https://doi.org/10.3389/fnins.2012.00009>
- 890 Kawagoe, R. (1998). Expectation of reward modulates cognitive signals in the basal ganglia. *Nature  
892 Neuroscience*, *1*(5), 411–416. doi: 10.1038/1625.
- 894 Lahiri, A. K., & Bevan, M. D. (2020). Dopaminergic Transmission Rapidly and Persistently Enhances  
896 Excitability of D1 Receptor-Expressing Striatal Projection Neurons. *Neuron*, *106*(2), 277–290.e6.  
<https://doi.org/10.1016/j.neuron.2020.01.028>
- 898 Lak, A., Stauffer, W. R., & Schultz, W. (2014). Dopamine prediction error responses integrate subjective  
900 value from different reward dimensions. *Proceedings of the National Academy of Sciences of the  
United States of America*, *111*(6), 2343–2348. <https://doi.org/10.1073/pnas.1321596111>
- 902 Lee, B. E., Kim, H. Y., Kim, H. J., Jeong, H., Kim, B. G., Lee, H. E., ... Kim, J. I. (2020). O-GlcNAcylation  
904 regulates dopamine neuron function, survival and degeneration in Parkinson disease. *Brain*, *143*(12),  
3699–3716. <https://doi.org/10.1093/brain/awaa320>
- 906 Lex, B., & Hauber, W. (2010). The role of nucleus accumbens dopamine in outcome encoding in  
908 instrumental and Pavlovian conditioning. *Neurobiology of Learning and Memory*, *93*(2), 283–290.  
<https://doi.org/10.1016/j.nlm.2009.11.002>
- 910 Manohar, S. G., Chong, T. T. J., Apps, M. A. J., Batla, A., Stamelou, M., Jarman, P. R., Bhatia, K. P., & Husain,  
912 M. (2015). Reward Pays the Cost of Noise Reduction in Motor and Cognitive Control. *Current  
Biology*, *25*(13), 1707–1716. <https://doi.org/10.1016/j.cub.2015.05.038>
- 914 Marcott, P. F., Mamaligas, A. A., & Ford, C. P. (2014). Phasic dopamine release drives rapid activation of  
916 striatal D<sub>2</sub>-receptors. *Neuron*, *84*(1), 164–176. <https://doi.org/10.1016/j.neuron.2014.08.058>
- 918 Mathis, A., Mamidanna, P., Cury, K. M., Abe, T., Murthy, V. N., Mathis, M. W., & Bethge, M. (2018).  
DeepLabCut: markerless pose estimation of user-defined body parts with deep learning. *Nature*



- 920 *Neuroscience*, 21(9), 1281–1289. <https://doi.org/10.1038/s41593-018-0209-y>
- 922 Murphy, E. R., Robinson, E. S. J., Theobald, D. E. H., Dalley, J. W., & Robbins, T. W. (2008). Contrasting  
924 effects of selective lesions of nucleus accumbens core or shell on inhibitory control and  
926 amphetamine-induced impulsive behaviour. *European Journal of Neuroscience*, 28(2), 353–363.  
928 <https://doi.org/10.1111/j.1460-9568.2008.06309.x>
- 930 Nicola, S. M., Taha, S. A., Kim, S. W., & Fields, H. L. (2005). Nucleus accumbens dopamine release is  
932 necessary and sufficient to promote the behavioral response to reward-predictive cues.  
934 *Neuroscience*, 135(4), 1025–1033. <https://doi.org/10.1016/j.neuroscience.2005.06.088>
- 936 Nicola, Saleem M. (2010). The flexible approach hypothesis: Unification of effort and cue-responding  
938 hypotheses for the role of nucleus accumbens dopamine in the activation of reward-seeking  
940 behavior. *Journal of Neuroscience*, 30(49), 16585–16600. <https://doi.org/10.1523/JNEUROSCI.3958-10.2010>
- 942 Niv, Y., Daw, N. D., Joel, D., & Dayan, P. (2007). Tonic dopamine: Opportunity costs and the control of  
936 response vigor. *Psychopharmacology*, 191(3), 507–520. <https://doi.org/10.1007/s00213-006-0502-4>
- 938 Oldenburg, I. A., & Sabatini, B. L. (2015). Antagonistic but Not Symmetric Regulation of Primary Motor  
940 Cortex by Basal Ganglia Direct and Indirect Pathways. *Neuron*, 86(5), 1174–1181.  
942 <https://doi.org/10.1016/j.neuron.2015.05.008>
- 944 Panigrahi, B., Martin, K. A., Li, Y., Graves, A. R., Vollmer, A., Olson, L., Mensh, B. D., Karpova, A. Y., &  
946 Dudman, J. T. (2015). Dopamine Is Required for the Neural Representation and Control of  
948 Movement Vigor. *Cell*, 162(6), 1418–1430. <https://doi.org/10.1016/j.cell.2015.08.014>
- 946 Papageorgiou, G. K., Baudonnat, M., Cucca, F., & Walton, M. E. (2016). Mesolimbic Dopamine Encodes  
948 Prediction Errors in a State-Dependent Manner. *Cell Reports*, 15(2), 221–228.  
950 <https://doi.org/10.1016/j.celrep.2016.03.031>
- 952 Passetti, F., Levita, L., & Robbins, T. W. (2003). Sulpiride alleviates the attentional impairments of rats  
954 with medial prefrontal cortex lesions. *Behavioural Brain Research*, 138(1), 59–69.  
956 [https://doi.org/10.1016/S0166-4328\(02\)00229-2](https://doi.org/10.1016/S0166-4328(02)00229-2)
- 958 Pattij, T., Janssen, M. C. W., Vanderschuren, L. J. M. J., Schoffelmeer, A. N. M., & Van Gaalen, M. M.  
960 (2007). Involvement of dopamine D1 and D2 receptors in the nucleus accumbens core and shell in  
962 inhibitory response control. *Psychopharmacology*, 191(3), 587–598.  
964 <https://doi.org/10.1007/s00213-006-0533-x>
- 966 Pezze, M. A., Dalley, J. W., & Robbins, T. W. (2007). Differential roles of dopamine D1 and D2 receptors in  
968 the nucleus accumbens in attentional performance on the five-choice serial reaction time task.  
970 *Neuropsychopharmacology*, 32(2), 273–283. <https://doi.org/10.1016/j.neuropharm.2006.08.014>
- 972 Phillips, P. E. M., Stuber, G. D., Helen, M. L. A. V., Wightman, R. M., & Carelli, R. M. (2003). Subsecond  
974 dopamine release promotes cocaine seeking. *Nature*, 422, 614–618.  
976 <https://doi.org/10.1038/nature01476>

- 968 Pompilio, L., & Kacelnik, A. (2010). Context-dependent utility overrides absolute memory as a  
determinant of choice. *Proceedings of the National Academy of Sciences of the United States of  
America*, *107*(1), 508–512. <https://doi.org/10.1073/pnas.0907250107>
- 970
- 972 Richfield, E. K., Penney, J. B., & Young, A. B. (1989). Anatomical and affinity state comparisons between  
dopamine D1 and D2 receptors in the rat central nervous system. *Neuroscience*, *30*(3), 767–777.  
[https://doi.org/10.1016/0306-4522\(89\)90168-1](https://doi.org/10.1016/0306-4522(89)90168-1)
- 974
- 976 Robbins, T. W., & Everitt, B. J. (2007). A role for mesencephalic dopamine in activation: Commentary on  
Berridge (2006). *Psychopharmacology*, *191*(3), 433–437. <https://doi.org/10.1007/s00213-006-0528-7>
- 978
- 980 Roitman, M. F., Stuber, G. D., Phillips, P. E. M., Wightman, R. M., & Carelli, R. M. (2004). Dopamine  
Operates as a Subsecond Modulator of Food Seeking. *Journal of Neuroscience*, *24*(6), 1265–1271.  
<https://doi.org/10.1523/JNEUROSCI.3823-03.2004>
- 982
- 984 Salamone, J. D., Correa, M., Farrar, A., & Mingote, S. M. (2007). Effort-related functions of nucleus  
accumbens dopamine and associated forebrain circuits. *Psychopharmacology*, *191*(3), 461–482.  
<https://doi.org/10.1007/s00213-006-0668-9>
- 986
- 988 Salamone, John D., & Correa, M. (2012). The Mysterious Motivational Functions of Mesolimbic Dopamine.  
*Neuron*, *76*(3), 470–485. <https://doi.org/10.1016/j.neuron.2012.10.021>
- 990
- 992 Saunders, B. T., Richard, J. M., Margolis, E. B., & Janak, P. H. (2018). Dopamine neurons create Pavlovian  
conditioned stimuli with circuit-defined motivational properties. *Nature Neuroscience*, *21*, 1072–  
1083. <https://doi.org/10.1038/s41593-018-0191-4>
- 994
- 996 Schmitz, Y., Schmauss, C., & Sulzer, D. (2002). Altered dopamine release and uptake kinetics in mice  
lacking D2 receptors. *Journal of Neuroscience*, *22*(18), 8002–8009.  
<https://doi.org/10.1523/jneurosci.22-18-08002.2002>
- 998
- 1000 Schuweiler, D. R., Athens, J. M., Thompson, J. M., Vazhayil, S. T., & Garris, P. A. (2018). Effects of an acute  
therapeutic or rewarding dose of amphetamine on acquisition of Pavlovian autoshaping and ventral  
striatal dopamine signaling. *Behavioural Brain Research*, *336*, 191–203.  
<https://doi.org/10.1016/j.bbr.2017.09.003>
- 1002
- 1004 Shadmehr, R, Huang, H. J., & Ahmed, A. A. (2016). Effort, reward, and vigor in decision-making and motor  
control. *Current Biology*, *26*(14), 1929–1934. <https://doi.org/10.1016/j.cub.2016.05.065>.
- 1006
- 1008 Shadmehr, Reza, Reppert, T. R., Summerside, E. M., Yoon, T., & Ahmed, A. A. (2019). Movement Vigor as a  
Reflection of Subjective Economic Utility. *Trends in Neurosciences*, *42*(5), 323–336.  
<https://doi.org/10.1016/j.tins.2019.02.003>
- 1010
- 1012 Shannon, C. E. (1948). A mathematical theory of communication. *The Bell System Technical Journal*, *27*,  
623–656. <https://doi.org/10.1002/j.1538-7305.1948.tb00917.x>.
- 1014
- 1012 Syed, E. C. J., Grima, L. L., Magill, P. J., Bogacz, R., Brown, P., & Walton, M. E. (2016). Action initiation  
shapes mesolimbic dopamine encoding of future rewards. *Nature Neuroscience*, *19*(1), 34–36.  
<https://doi.org/10.1038/nn.4187>

- 1016 Tecuapetla, F., Jin, X., Lima, S. Q., & Costa, R. M. (2016). Complementary Contributions of Striatal  
1018 Projection Pathways to Action Initiation and Execution. *Cell*, 166(3), 703–715.  
1020 <https://doi.org/10.1016/j.cell.2016.06.032>
- 1022 Tritsch, N. X., & Sabatini, B. L. (2012). Dopaminergic Modulation of Synaptic Transmission in Cortex and  
1024 Striatum. *Neuron*, 76(1), 33–50. <https://doi.org/10.1016/j.neuron.2012.09.023>
- 1026 Tsutsui-kimura, I., Matsumoto, H., Akiti, K., Yamada, M. M., Uchida, N., & Watabe-Uchida, M. (2020).  
1028 Distinct temporal difference error signals in dopamine axons in three regions of the striatum in a  
1030 decision-making task. *ELife*, 9, e62390. [10.7554/eLife.62390](https://doi.org/10.7554/eLife.62390)
- 1032 Van Gaalen, M. M., Bruggeman, R. J., Bronius, P. F. C., Schoffelmeer, A. N. M., & Vanderschuren, L. J. M.  
1034 J. (2006). Behavioral disinhibition requires dopamine receptor activation. *Psychopharmacology*, 187,  
1036 73–85. <https://doi.org/10.1007/s00213-006-0396-1>
- 1038 Walton, M. E., & Bouret, S. (2019). What Is the Relationship between Dopamine and Effort? *Trends in  
1040 Neurosciences*, 42(2), 79–91. <https://doi.org/10.1016/j.tins.2018.10.001>
- 1042 Westbrook, A., & Frank, M. (2018). Dopamine and proximity in motivation and cognitive control. *Current  
1044 Opinion in Behavioral Sciences*, 22, 28–34. <https://doi.org/10.1016/j.cobeha.2017.12.011>.
- 1046 Westbrook, A., van den Bosch, R., Määttä, J. I., Hofmans, L., Papadopetraki, D., Cools, R., & Frank, M. J.  
1048 (2020). Dopamine promotes cognitive effort by biasing the benefits versus costs of cognitive work.  
1050 *Science*, 367(6484), 1362–1366. <https://doi.org/10.1101/778134>
- 1052 Yun, I. A., Nicola, S. M., & Fields, H. L. (2004). Contrasting effects of dopamine and glutamate receptor  
1054 antagonist injection in the nucleus accumbens suggest a neural mechanism underlying cue-evoked  
1056 goal-directed behavior. *European Journal of Neuroscience*, 20(1), 249–263.  
1058 <https://doi.org/10.1111/j.1460-9568.2004.03476.x>  
1060

## Supplementary text

1062 *Supp. Text 1: [Global D2R stimulation modulates action vigour](#)*

To understand how specific the observed systemic effects were to D1R manipulation, we also investigated  
1064 the effect of systemic administration of either a D2R agonist or antagonist (both cohort 1). The D2R agonist  
increased the proportion of premature responses during the pre-cue period (main effect of drug:  $F_{(2,16)} =$   
1066  $3.652, p = .049$ ), but neither the agonist nor antagonist had any effect on No-Go success, time spent in the  
nosepoke on successful No-Go trials, nor the distribution of early and late No-Go errors (all  $p > .1$ , data not  
1068 shown).

However, the D2R agonist did markedly slow reward retrieval latencies in No-Go trials (main effect of drug:  
1070  $F_{(2,14)} = 23.044, p < .001$ ) and this effect was paralleled by an overall slowing of movements in Go trials. It  
strongly decreased success rates (Supp. Fig. 1a; main effect of drug:  $F_{(2,16)} = 45.299, p < .001$ ) – mainly due  
1072 to an increase in response omissions (Supp. Fig. 1b; main effect of drug:  $F_{(2,16)} = 58.576, p < .001$ ; lever  
selection errors, Supp. Fig. 1c; all  $p > .06$ ) – and also slowed all latencies, including action initiation (at the  
1074 highest dose), travel time, and reward retrieval (Supp. Fig. 1d-f; all  $F > 7, p < .004$ ; also reward retrieval:  
drug x reward interaction:  $F_{(2,16)} = 7.962, p = .005$ ). In contrast, the D2R antagonist had no reliable effect on  
1076 any measure of either No-Go or Go performance or response time (Supp. Fig. 1g-l; all  $p > .08$ ). Together,  
these results show that stimulating D2Rs reduces the vigour of all actions – both in Go and No-Go trials –  
1078 an effect distinct to the influence of D1Rs which mainly affected the vigour of actions distal to reward.

1080 **Supplementary figure 1**

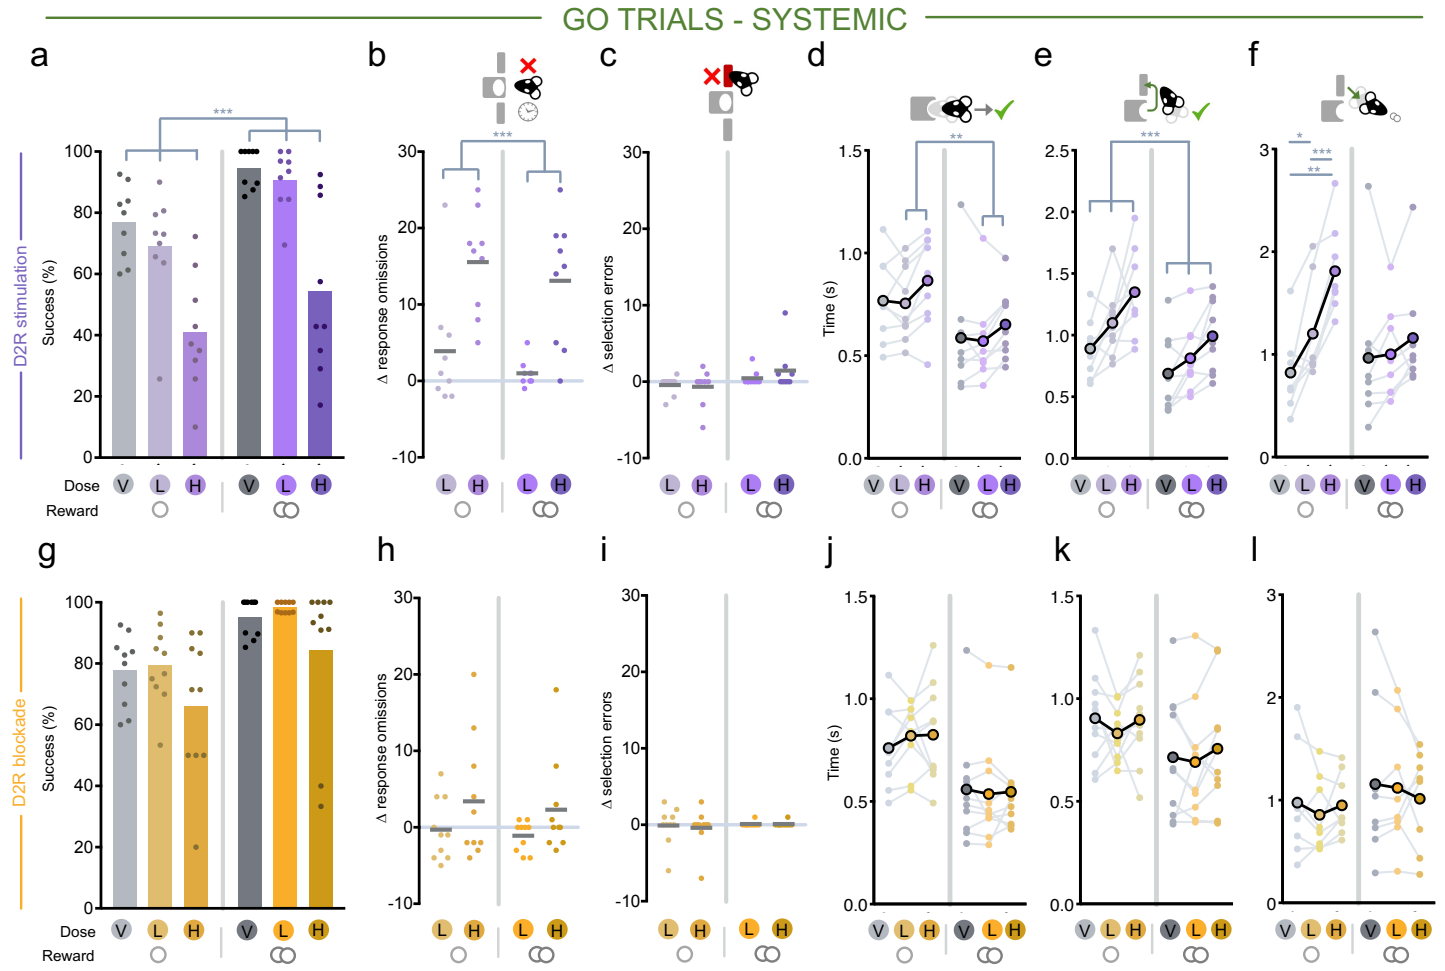

1082 **Supp. Fig. 1. Systemic effects of D2R stimulation (quinpirole) or blockade (eticlopride) in Go trials.** V = vehicle, L = low  
 1084 dose, H = high dose. Single circle indicates small reward condition, double circle indicates large reward condition. **(a-  
 1086 f)** Effects of D2R stimulation split by small (left) and large (right) reward Go trials on **(a)** success rate, **(b)** response  
 1088 omission errors, **(c)** lever selection errors, **(d)** latency to leave the nosepoke after Go cue onset, **(e)** latency from  
 1090 nosepoke exit to first lever press, **(f)** and latency from trial completion to entering the food magazine to retrieve  
 1092 reward. **(g-l)** Same as in **(a-f)** but for systemic D2R blockade. \*\*\* $p < .001$ , \*\* $p < .01$ , \* $p < .05$

1088

1090

1092

1094

1096

1098 **Supplementary figure 2**

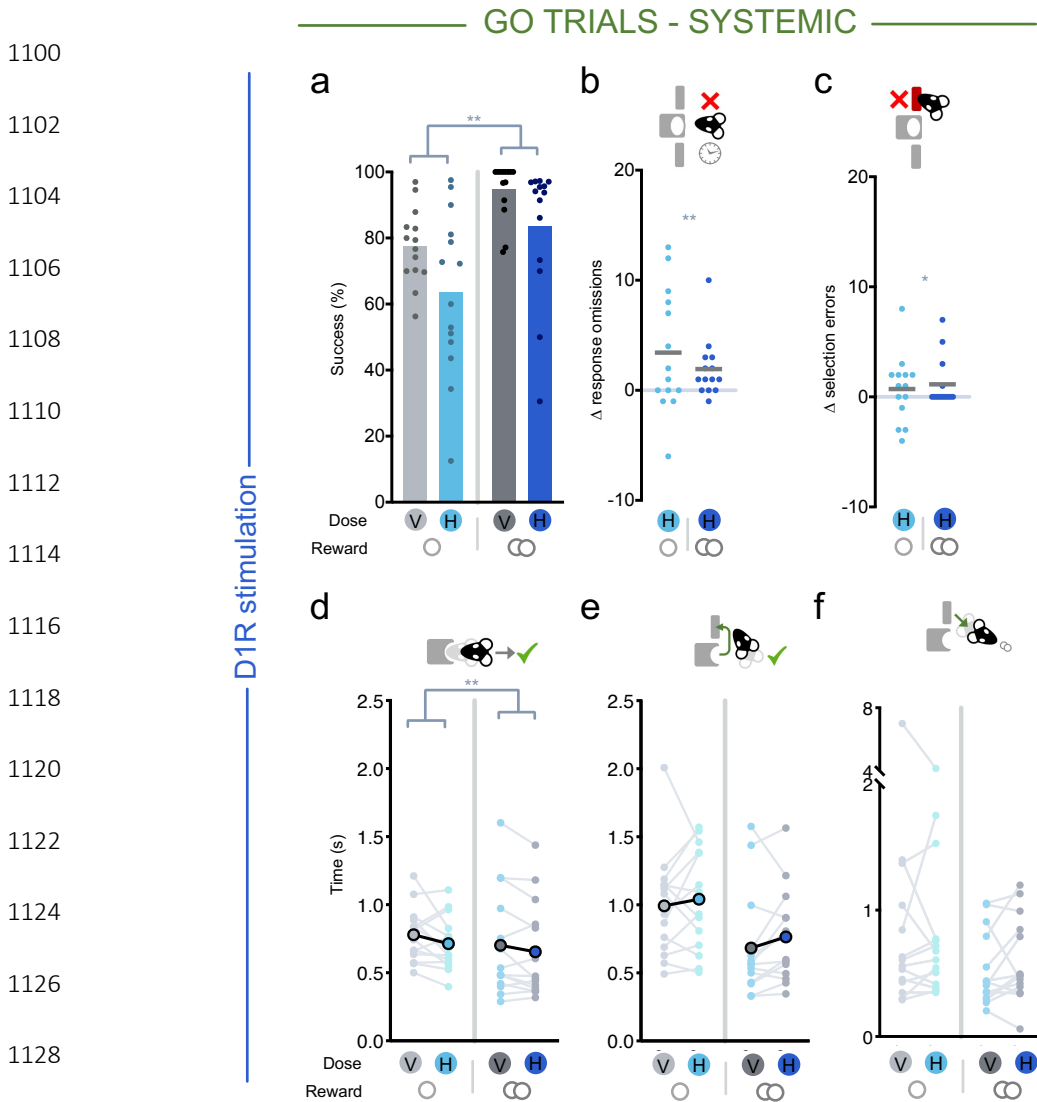

**Supp. Fig. 2. Systemic D1R stimulation replication study results.** Effect of D1R stimulation on **(a)** success rate (main effect of drug:  $F_{(1,13)} = 14.237, p = .002$ ), **(b)** response omission errors (main effect of drug:  $F_{(1,13)} = 11.424, p = .005$ ), **(c)** lever selection errors (main effect of drug:  $F_{(1,13)} = 4.694, p = .049$ ) **(d)** latency to leave the nosepoke after Go cue onset (main effect of drug:  $F_{(1,13)} = 10.895, p = .006$ ), **(e)** latency from nosepoke exit to first lever press (main effect of drug and interaction n.s.,  $p > .1$ ), **(f)** and latency from reward delivery to entering the food magazine to retrieve reward (main effect of drug and interaction n.s.,  $p > .3$ ). \*\*  $p < .01$ , \*  $p < .05$

1144 **Supplementary figure 3**

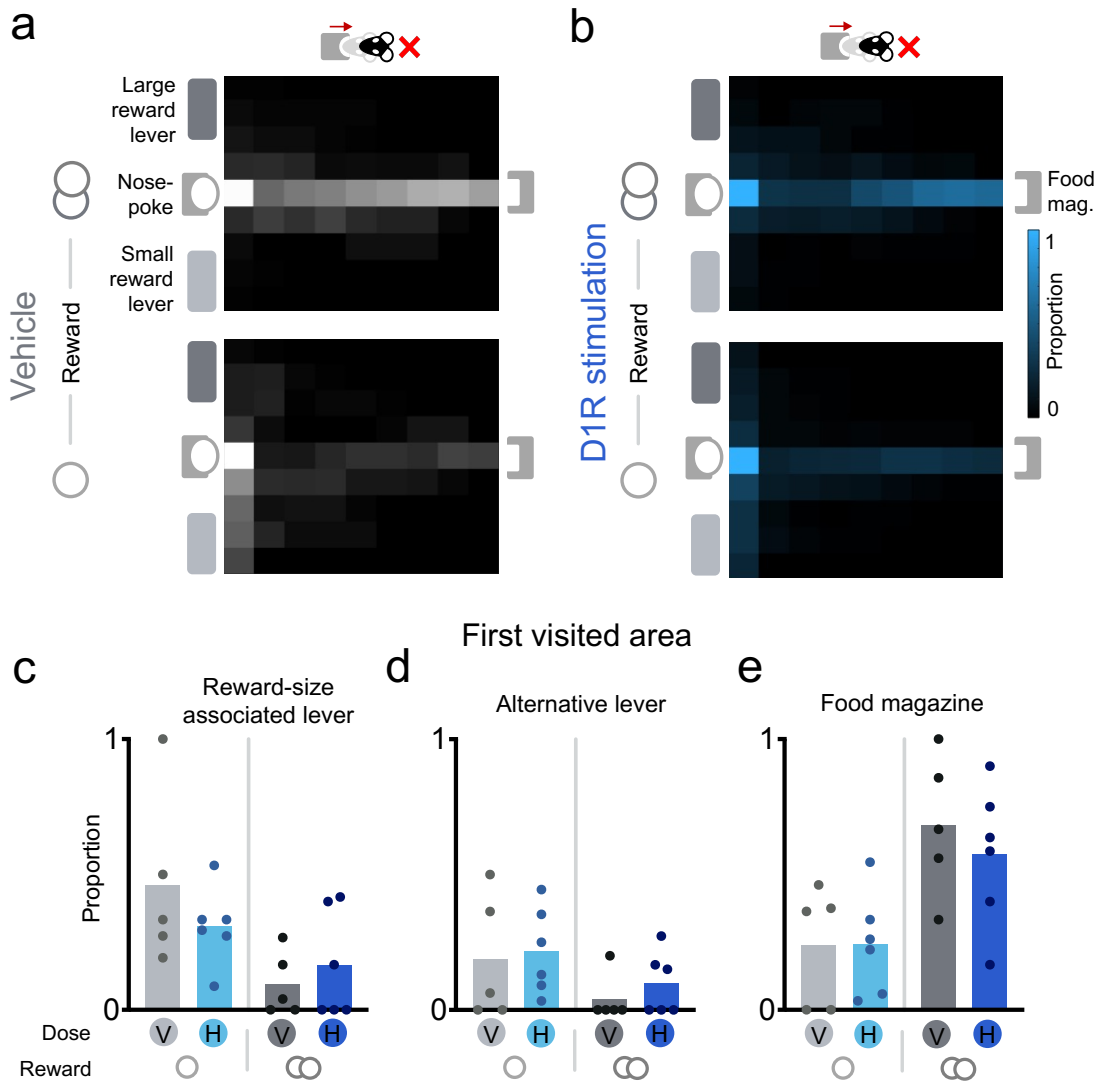

1146 **Supp. Fig. 3. The effects of intra-NAcc D1R stimulation (SKF-81297) in error No-Go trials. (a, b)** Mean probability  
 1148 density across rats in small (lower) or large (upper) reward error No-Go trials when **(a)** on vehicle or **(b)** with intra-  
 1150 NAcc infusion of the D1R agonist. **(c-e)** Proportion of trials in which the first area of the operant chamber visited by  
 1152 the rats was **(c)** the reward size-associated lever, corresponding to the large reward lever on large reward No-Go trials  
 and the small reward lever on small reward No-Go trials, **(d)** the alternative lever, and **(e)** the food magazine. Location  
 pairwise comparisons: reward-size associated lever vs. food magazine:  $p = .032$ , alternative lever vs. food magazine:  
 $p = .002$ , reward-size associated lever vs. alternative lever:  $p = .196$ .

1154

1156

## Supplementary figure 4

**a**

- Included
- Excluded

mm from Bregma

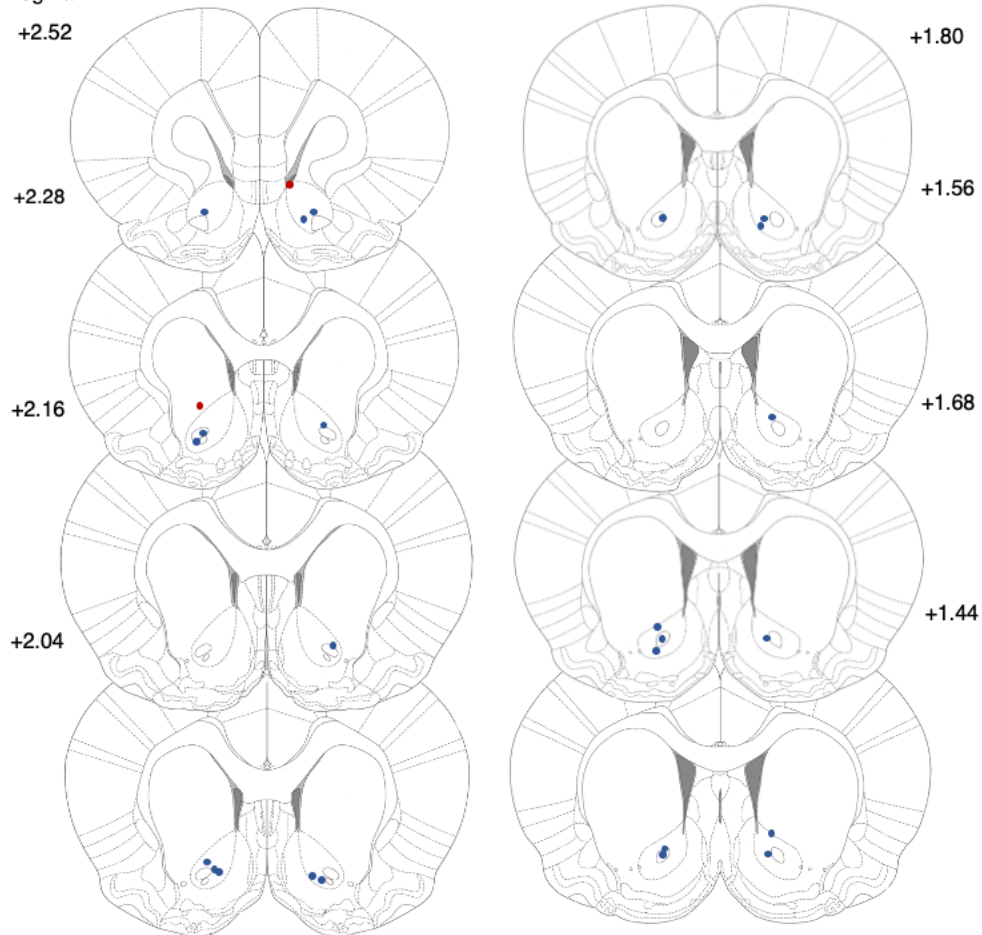

**b**

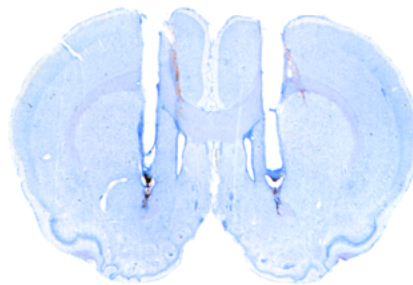

1174

1174 **Supp. Fig. 4. Injector placement.** (a) Schematic of cannula insertion locations in the NACc (n = 14, all rats bilaterally  
1176 implanted). Cannulae locations of included rats are marked in blue, excluded rats (n = 1) are marked in red. Numbers  
1178 to the left of coronal sections indicate distance anterior to bregma (mm). Adapted from the atlas of Paxinos and  
Watson (2009). (b) Example photo scan of a perfused section showing bilateral injector lesion and guide cannulae  
placement.
